# Supplementary material for: Human Microbe-Disease Association Prediction Based on Adaptive Boosting
Source: Front Microbiol. 2018 Oct 9;9:2440. doi: 10.3389/fmicb.2018.02440 (PMC6189371; doi:10.3389/fmicb.2018.02440)
Supplement: Supplementary file 2 [file Table_2.XLSX]

## Sheet: Sheet1
disease	microbe	Score
Cystic fibrosis	Lachnospiraceae	16.8477
Asthma	Lachnospiraceae	15.8386
Psoriasis	Lachnospiraceae	15.8365
Obesity	Lachnospiraceae	15.8365
Cystic fibrosis	Proteobacteria	15.659
Asthma	Veillonella	15.6305
Psoriasis	Veillonella	15.6305
Bacterial Vaginosis	Veillonella	15.6305
COPD	Veillonella	15.6305
Ileal Crohn's disease(CD)	Veillonella	15.6305
Periodontal	Veillonella	15.6305
Clostridium difficile infection(CDI)	Veillonella	15.6305
Obesity	Veillonella	15.6305
Cystic fibrosis	Veillonella	15.6305
Crohn's disease(CD)	Veillonella	15.6305
Colorectal carcinoma	Veillonella	15.6305
Type 2 diabetes	Veillonella	15.6305
Periodontal	Lachnospiraceae	15.5016
Bacterial Vaginosis	Lachnospiraceae	15.5016
Type 1 diabetes	Clostridiales	15.3615
Type 1 diabetes	Enterobacteriaceae	15.2034
Irritable bowel syndrome(IBS)	Fusobacteria	15.2034
Type 1 diabetes	Gammaproteobacteria	15.2034
Periodontal	Enterobacteriaceae	15.2034
Crohn's disease(CD)	Klebsiella	15.2034
Bacterial Vaginosis	Enterobacteriaceae	15.2034
Irritable bowel syndrome(IBS)	Eubacterium eligens	15.1673
Irritable bowel syndrome(IBS)	Faecalibacterium	15.1673
Irritable bowel syndrome(IBS)	Odoribacter	15.1673
Irritable bowel syndrome(IBS)	Parabacteroides	15.1673
Irritable bowel syndrome(IBS)	Subdoligranulum	15.1673
Irritable bowel syndrome(IBS)	Roseburia	15.1673
Irritable bowel syndrome(IBS)	Phascolarctobacterium	15.1673
Irritable bowel syndrome(IBS)	Alistipes	15.1673
Irritable bowel syndrome(IBS)	Eubacterium rectale	15.1673
Type 1 diabetes	Escherichia coli	15.1236
Asthma	Clostridium coccoides	15.1146
Type 1 diabetes	Veillonellaceae	14.952
Type 1 diabetes	Fusobacteriaceae	14.952
Cystic fibrosis	Prevotella	14.7875
Colorectal carcinoma	Klebsiella	14.7769
Clostridium difficile infection(CDI)	Enterobacteriaceae	14.7076
Colorectal carcinoma	Enterobacteriaceae	14.651
Obesity	Proteobacteria	14.6371
Psoriasis	Bacteroidetes	14.6371
Bacterial Vaginosis	Proteobacteria	14.6361
Bacterial Vaginosis	Bacteroidetes	14.6361
Crohn's disease(CD)	Lachnospiraceae	14.4777
COPD	Lachnospiraceae	14.3559
Periodontal	Proteobacteria	14.2092
Periodontal	Bacteroidetes	14.2092
Cystic fibrosis	Bacteroidetes	14.1527
Skin and mucosal infections	Escherichia coli	14.129
Guttate psoriasis	Veillonella	14.0285
Colon cancer	Veillonella	14.0285
Kidney stones	Veillonella	14.0285
Systemic inflammatory response syndrome	Veillonella	14.0285
Eczema	Veillonella	14.0285
Allergic sensitization	Veillonella	14.0285
Inflammatory bowel disease(IBD)	Veillonella	14.0285
Infectious colitis	Veillonella	14.0285
Gastro-oesophageal reflux	Veillonella	14.0285
Allergy	Veillonella	14.0285
New-onset untreated rheumatoid arthrits	Veillonella	14.0285
Skin and mucosal infections	Veillonella	14.0285
Allergic asthma	Veillonella	14.0285
Diarrhea Irritable bowel syndrome(IBS)	Veillonella	14.0285
Atopic sensitisation	Veillonella	14.0285
Atopic dermatitis	Veillonella	14.0285
Gastric and duodenal ulcer	Veillonella	14.0285
Whipple's disease	Veillonella	14.0285
Recurrent wheeze	Veillonella	14.0285
Atopy	Veillonella	14.0285
Type 1 diabetes	Clostridium leptum	13.9733
Type 1 diabetes	Erysipelotrichales	13.9592
Type 1 diabetes	Bacteroidales	13.9592
Type 1 diabetes	Enterococcus faecium	13.9592
Cystic fibrosis	Clostridium coccoides	13.8978
Crohn's disease(CD)	Clostridium coccoides	13.7873
Bacterial Vaginosis	Klebsiella	13.6346
Clostridium difficile infection(CDI)	Klebsiella	13.6346
Periodontal	Klebsiella	13.6346
COPD	Clostridium coccoides	13.632
Crohn's disease(CD)	Bacteroidetes	13.5714
Crohn's disease(CD)	Proteobacteria	13.5714
Type 1 diabetes	Dorea	13.5509
Type 1 diabetes	Coprococcus	13.5509
Type 1 diabetes	Pasteurellaceae	13.5509
Type 1 diabetes	Streptococcaceae	13.5509
Type 1 diabetes	Haemophilus parainfluenzae	13.5509
Type 1 diabetes	Ruminococcus	13.5509
Colorectal carcinoma	Proteobacteria	13.4964
Type 1 diabetes	Clostridium coccoides	13.3618
Bacterial Vaginosis	Fusobacteriaceae	13.2537
Bacterial Vaginosis	Veillonellaceae	13.2537
Colorectal carcinoma	Lachnospiraceae	13.2481
Type 2 diabetes	Lachnospiraceae	13.2481
Necrotizing Enterocolitis	Bacteroides	13.2084
Bacterial Vaginosis	Bacteroides	13.2082
Clostridium difficile infection(CDI)	Bacteroides	13.2082
Periodontal	Bacteroides	13.2082
Crohn's disease(CD)	Bacteroides	13.2082
Necrotizing Enterocolitis	Clostridium coccoides	13.2051
Clostridium difficile infection(CDI)	Clostridium coccoides	13.2012
Liver cirrhosis	Clostridium coccoides	13.1651
Colorectal carcinoma	Clostridium coccoides	13.1629
Ileal Crohn's disease(CD)	Bacteroidetes	13.1014
Ileal Crohn's disease(CD)	Proteobacteria	13.1014
Cystic fibrosis	Bacteroides uniformis	13.0446
Liver cirrhosis	Gammaproteobacteria	13.035
Skin and mucosal infections	Betaproteobacteria	12.9912
Type 1 diabetes	Faecalibacterium prausnitzii	12.7929
Skin and mucosal infections	Clostridiales	12.7565
Liver cirrhosis	Porphyromonadaceae	12.7486
Psoriasis	Clostridium coccoides	12.7274
Obesity	Clostridium coccoides	12.7274
Bacterial Vaginosis	Bacteroides ovatus	12.6624
Necrotizing Enterocolitis	Lachnospiraceae	12.6237
Periodontal	Bacteroides ovatus	12.6224
Irritable bowel syndrome(IBS)	Prevotella	12.5794
Type 1 diabetes	Clostridium	12.4638
Necrotizing Enterocolitis	Prevotella	12.2389
Crohn's disease(CD)	Prevotella	12.1511
Clostridium difficile infection(CDI)	Bacteroides ovatus	12.148
Psoriasis	Bacteroides ovatus	12.1331
Ulcerative colitis	Veillonella	12.1308
Rheumatoid arthrits	Veillonella	12.1308
Type 1 diabetes	Betaproteobacteria	12.0966
Clostridium difficile infection(CDI)	Prevotella	12.0722
Rheumatoid arthrits	Proteobacteria	12.0558
Obesity	Streptococcus	12.0508
Psoriasis	Prevotella	12.0389
Obesity	Prevotella	12.0389
Cystic fibrosis	Helicobacter pylori	12.0067
Cystic fibrosis	Enterococcus	11.9636
Irritable bowel syndrome(IBS)	Clostridiales	11.9594
Colorectal carcinoma	Streptococcus	11.9421
Obesity	Actinobacteria	11.8775
Bacterial Vaginosis	Escherichia coli	11.8718
Skin and mucosal infections	Desulfovibrio	11.8371
Bacterial Vaginosis	Clostridium coccoides	11.7328
Irritable bowel syndrome(IBS)	Escherichia coli	11.7214
Colorectal carcinoma	Actinobacteria	11.6705
Asthma	Firmicutes	11.6433
COPD	Firmicutes	11.6433
Clostridium difficile infection(CDI)	Clostridiales	11.5966
Type 1 diabetes	Fusobacterium nucleatum	11.5923
Cystic fibrosis	Haemophilus	11.5718
Asthma	Streptococcus	11.5436
COPD	Streptococcus	11.5436
Irritable bowel syndrome(IBS)	Betaproteobacteria	11.498
Liver cirrhosis	Betaproteobacteria	11.4917
Type 1 diabetes	Bacilli	11.4911
Irritable bowel syndrome(IBS)	Streptococcus	11.4895
Liver cirrhosis	Clostridiales	11.485
Irritable bowel syndrome(IBS)	Bacteroides ovatus	11.4784
Skin and mucosal infections	Lachnospiraceae	11.473
Psoriasis	Lactobacillus	11.4237
Psoriasis	Escherichia coli	11.4161
Cystic fibrosis	Veillonellaceae	11.3859
Cystic fibrosis	Fusobacteriaceae	11.3859
Clostridium difficile infection(CDI)	Escherichia coli	11.3587
Cystic fibrosis	Betaproteobacteria	11.3281
Rheumatoid arthrits	Bacteroidetes	11.3204
Atopic dermatitis	Lachnospiraceae	11.2947
Inflammatory bowel disease(IBD)	Clostridium coccoides	11.2685
Periodontal	Clostridium coccoides	11.266
Obesity	Escherichia coli	11.2612
Liver cirrhosis	Escherichia coli	11.247
Whipple's disease	Prevotella	11.2425
Whipple's disease	Bifidobacterium	11.2328
Colorectal carcinoma	Lactobacillus	11.2167
Skin and mucosal infections	Staphylococcus epidermidis	11.1806
Skin and mucosal infections	Dietzia maris	11.1806
Psoriasis	Bacteroides uniformis	11.1562
Psoriasis	Clostridiales	11.1163
Skin and mucosal infections	Clostridium coccoides	11.0846
Atopic dermatitis	Escherichia coli	11.0699
Whipple's disease	Staphylococcus aureus	11.0495
Irritable bowel syndrome(IBS)	Fusobacteriaceae	11.0491
Irritable bowel syndrome(IBS)	Veillonellaceae	11.0491
Infectious colitis	Klebsiella	11.0067
COPD	Actinobacteria	10.9989
Asthma	Actinobacteria	10.9989
Ileal Crohn's disease(CD)	Streptococcus	10.9642
Crohn's disease(CD)	Streptococcus	10.943
Skin and mucosal infections	Proteobacteria	10.9408
Skin and mucosal infections	Bifidobacterium	10.9275
Systemic inflammatory response syndrome	Clostridium coccoides	10.8951
Ulcerative colitis	Bacteroidetes	10.8936
Systemic inflammatory response syndrome	Bacteroidetes	10.8936
Inflammatory bowel disease(IBD)	Bacteroidetes	10.8936
Crohn's disease(CD)	Helicobacter pylori	10.8835
Bacterial Vaginosis	Alistipes	10.8297
Bacterial Vaginosis	Parabacteroides	10.8297
Obesity	Faecalibacterium prausnitzii	10.8107
Psoriasis	Faecalibacterium prausnitzii	10.8035
Obesity	Bacteroides uniformis	10.7225
Bacterial Vaginosis	Clostridium leptum	10.7215
Bacterial Vaginosis	Streptococcus	10.7155
Bacterial Vaginosis	Erysipelotrichales	10.7075
Bacterial Vaginosis	Enterococcus faecium	10.7075
Bacterial Vaginosis	Bacteroidales	10.7075
Type 1 diabetes	Shigella dysenteriae	10.6712
Type 1 diabetes	Enterobacter hormaechei	10.6712
Type 1 diabetes	Klebsiella pneumoniae	10.6712
Type 1 diabetes	Enterobacter aerogenes	10.6712
Clostridium difficile infection(CDI)	Actinobacteria	10.6601
Colorectal carcinoma	Bacteroides uniformis	10.6034
Periodontal	Bacteroides uniformis	10.5879
Systemic inflammatory response syndrome	Proteobacteria	10.5868
Whipple's disease	Clostridium coccoides	10.5818
Bacterial Vaginosis	Bacteroides uniformis	10.5807
COPD	Helicobacter pylori	10.5755
Cystic fibrosis	Bacilli	10.5745
Periodontal	Clostridiales	10.5619
Obesity	Bacteroides ovatus	10.547
Liver cirrhosis	Eubacteriaceae	10.5275
Type 1 diabetes	Helicobacter pylori	10.5247
Type 1 diabetes	Megasphaera	10.5225
Cystic fibrosis	Bacteroides ovatus	10.5042
Whipple's disease	Lachnospiraceae	10.5019
COPD	Betaproteobacteria	10.4963
Inflammatory bowel disease(IBD)	Prevotella	10.4955
Type 2 diabetes	Prevotella	10.4577
Type 2 diabetes	Streptococcus	10.4358
Necrotizing Enterocolitis	Streptococcus	10.4358
Colon cancer	Clostridium coccoides	10.4309
Periodontal	Escherichia coli	10.4238
Irritable bowel syndrome(IBS)	Helicobacter pylori	10.3571
Colon cancer	Lachnospiraceae	10.3511
Ileal Crohn's disease(CD)	Escherichia coli	10.3495
Systemic inflammatory response syndrome	Lachnospiraceae	10.3462
Skin and mucosal infections	Bacteroidetes	10.3165
Clostridium difficile infection(CDI)	Lactobacillus	10.3143
Type 1 diabetes	Verrucomicrobiaceae	10.282
Whipple's disease	Proteobacteria	10.2735
Liver cirrhosis	Firmicutes	10.262
Cystic fibrosis	Escherichia coli	10.2093
Clostridium difficile infection(CDI)	Faecalibacterium prausnitzii	10.179
Clostridium difficile infection(CDI)	Streptococcus	10.168
Psoriasis	Fusobacteriaceae	10.1659
Psoriasis	Veillonellaceae	10.1659
Type 2 diabetes	Actinobacteria	10.1642
Clostridium difficile infection(CDI)	Bacteroides uniformis	10.1135
Colorectal carcinoma	Faecalibacterium prausnitzii	10.0997
Asthma	Lactobacillus	10.0761
Obesity	Klebsiella	10.0631
Obesity	Enterobacteriaceae	10.0631
Colorectal carcinoma	Clostridium	10.057
Ulcerative colitis	Escherichia coli	10.0399
Rheumatoid arthrits	Escherichia coli	10.0399
Type 1 diabetes	Staphylococcus	10.0389
Periodontal	Firmicutes	10.0271
Liver cirrhosis	Helicobacter pylori	10.0181
Cystic fibrosis	Pseudomonas	9.95349
Clostridium difficile infection(CDI)	Haemophilus	9.95166
Bacterial Vaginosis	Haemophilus	9.95124
Psoriasis	Haemophilus	9.93285
Obesity	Haemophilus	9.93285
Atopic dermatitis	Clostridium coccoides	9.92752
Type 1 diabetes	Erysipelotrichaceae	9.90749
Type 1 diabetes	Methanobrevibacter smithii	9.90749
Type 1 diabetes	Coriobacteriaceae	9.90749
Type 1 diabetes	Alcaligenaceae	9.90749
Allergic asthma	Bifidobacterium	9.90242
Bacterial Vaginosis	Bacilli	9.89246
Irritable bowel syndrome(IBS)	Bacteroides uniformis	9.8844
Cystic fibrosis	Firmicutes	9.87787
Crohn's disease(CD)	Actinobacteria	9.8665
Liver cirrhosis	Bacteroides ovatus	9.85888
Colorectal carcinoma	Betaproteobacteria	9.85793
Clostridium difficile infection(CDI)	Helicobacter pylori	9.85
Obesity	Helicobacter pylori	9.81673
Psoriasis	Helicobacter pylori	9.81673
Bacterial Vaginosis	Faecalibacterium prausnitzii	9.79563
COPD	Bacteroides uniformis	9.7644
Asthma	Bacteroides uniformis	9.7644
Asthma	Enterococcus	9.7501
Skin and mucosal infections	Prevotella	9.73093
Psoriasis	Clostridium	9.71175
Bacterial Vaginosis	Bacteroides vulgatus	9.66817
Whipple's disease	Desulfovibrio	9.6663
Liver cirrhosis	Shigella dysenteriae	9.66314
Liver cirrhosis	Enterobacter aerogenes	9.66314
Liver cirrhosis	Enterobacter hormaechei	9.66314
Liver cirrhosis	Klebsiella pneumoniae	9.66314
Atopic sensitisation	Prevotella	9.65308
Atopy	Prevotella	9.65308
Periodontal	Fusobacteriaceae	9.65161
Periodontal	Veillonellaceae	9.65161
Allergic asthma	Staphylococcus aureus	9.64613
Inflammatory bowel disease(IBD)	Escherichia coli	9.62629
Atopy	Escherichia coli	9.62629
Obesity	Lactobacillus	9.62585
COPD	Fusobacterium	9.60815
Cystic fibrosis	Klebsiella	9.56736
Cystic fibrosis	Enterobacteriaceae	9.56736
Clostridium difficile infection(CDI)	Fusobacteriaceae	9.55233
Clostridium difficile infection(CDI)	Veillonellaceae	9.55233
Irritable bowel syndrome(IBS)	Fusobacterium	9.53986
Clostridium difficile infection(CDI)	Bacilli	9.52696
Cystic fibrosis	Collinsella aerofaciens	9.5209
Colorectal carcinoma	Bacteroides ovatus	9.51433
COPD	Enterococcus	9.49977
Cystic fibrosis	Clostridiales	9.48133
Necrotizing Enterocolitis	Helicobacter pylori	9.46769
Ileal Crohn's disease(CD)	Enterobacteriaceae	9.46341
Rheumatoid arthrits	Actinobacteria	9.45598
Psoriasis	Klebsiella	9.42332
Irritable bowel syndrome(IBS)	Bacilli	9.42154
Irritable bowel syndrome(IBS)	Citrobacter	9.41994
Liver cirrhosis	Citrobacter	9.41994
Periodontal	Lactobacillus	9.41807
Gastric and duodenal ulcer	Escherichia coli	9.41126
Allergic asthma	Escherichia coli	9.41126
Gastro-oesophageal reflux	Escherichia coli	9.41126
Allergy	Escherichia coli	9.41126
Cystic fibrosis	Bacteroides vulgatus	9.37667
Clostridium difficile infection(CDI)	Clostridium	9.36904
Cystic fibrosis	Fusobacterium	9.35593
Colon cancer	Prevotella	9.3549
Asthma	Escherichia coli	9.34385
Psoriasis	Fusobacterium	9.33956
Asthma	Betaproteobacteria	9.33851
Cystic fibrosis	Bifidobacterium	9.30656
Cystic fibrosis	Faecalibacterium prausnitzii	9.29464
Atopic sensitisation	Staphylococcus aureus	9.27199
Irritable bowel syndrome(IBS)	Roseburia intestinalis	9.26954
Irritable bowel syndrome(IBS)	Lachnospira	9.26954
Irritable bowel syndrome(IBS)	Bacteroides sp. D20	9.26954
Irritable bowel syndrome(IBS)	Lactobacillus salivarius	9.26954
Irritable bowel syndrome(IBS)	Bacteroides finegoldii	9.26954
Irritable bowel syndrome(IBS)	Ruminococcus gnavus	9.26954
Irritable bowel syndrome(IBS)	Bilophila wadsworthia	9.26954
Irritable bowel syndrome(IBS)	Bacteroides eggerthii	9.26954
Irritable bowel syndrome(IBS)	Roseburia hominis	9.26954
Irritable bowel syndrome(IBS)	Eubacterium hallii	9.26954
Irritable bowel syndrome(IBS)	Bilophila	9.26954
Irritable bowel syndrome(IBS)	Parabacteroides distasonis	9.26954
Irritable bowel syndrome(IBS)	Parabacteroides merdae	9.26954
Irritable bowel syndrome(IBS)	Odoribacter splanchnicus	9.26954
Irritable bowel syndrome(IBS)	Streptococcus vestibularis	9.26954
Irritable bowel syndrome(IBS)	Streptococcus salivarius	9.26954
Irritable bowel syndrome(IBS)	Holdemania	9.26954
Irritable bowel syndrome(IBS)	Alistipes finegoldii	9.26954
Irritable bowel syndrome(IBS)	Streptococcus parasanguinis	9.26954
Irritable bowel syndrome(IBS)	Streptococcus anginosus	9.26954
Irritable bowel syndrome(IBS)	Alistipes putredinis	9.26954
Irritable bowel syndrome(IBS)	Enterococcus faecalis	9.26954
Irritable bowel syndrome(IBS)	Veillonella atypica	9.26954
Irritable bowel syndrome(IBS)	Veillonella dispar	9.26954
Irritable bowel syndrome(IBS)	Veillonella parvula	9.26954
Atopic dermatitis	Bacteroides ovatus	9.26678
Crohn's disease(CD)	Haemophilus	9.19837
COPD	Escherichia coli	9.18956
Allergic asthma	Proteobacteria	9.18643
Clostridium difficile infection(CDI)	Betaproteobacteria	9.18349
Ulcerative colitis	Prevotella	9.18345
Type 1 diabetes	Porphyromonas uenonis	9.17739
Type 1 diabetes	Papillibacter	9.17739
Type 1 diabetes	Leptotrichia amnionii	9.17739
Type 1 diabetes	Leptotrichia	9.17739
Type 1 diabetes	Olsenella	9.17739
Type 1 diabetes	Lactobacillus iners	9.17739
Type 1 diabetes	Mobiluncus	9.17739
Type 1 diabetes	Aerococcus	9.17739
Type 1 diabetes	Gardnerella vaginalis	9.17739
Type 1 diabetes	Atopobium	9.17739
Type 1 diabetes	Gardnerella	9.17739
Type 1 diabetes	Streptobacillus	9.17739
Type 1 diabetes	Atopobium vaginae	9.17739
Type 1 diabetes	Candidate division TM7	9.17739
Type 1 diabetes	Eggerthella	9.17739
Type 1 diabetes	Lactobacillus crispatus	9.17739
Obesity	Clostridiales	9.16351
Colorectal carcinoma	Staphylococcus	9.13011
Asthma	Bacteroides ovatus	9.11589
COPD	Bacteroides ovatus	9.11589
Infectious colitis	Enterobacteriaceae	9.10896
Cystic fibrosis	Megasphaera	9.10882
Colorectal carcinoma	Enterococcus	9.08277
Allergic asthma	Clostridium coccoides	9.08123
Skin and mucosal infections	Actinomyces	9.07546
Skin and mucosal infections	Xanthomonas	9.07546
Skin and mucosal infections	Streptococcus mitis	9.07546
Skin and mucosal infections	Rickettsiales	9.07546
Skin and mucosal infections	Porphyromonas gingivalis	9.07546
Skin and mucosal infections	Treponema	9.07546
Skin and mucosal infections	Oxalobacter formigenes	9.07546
Skin and mucosal infections	Lysobacter	9.07546
Skin and mucosal infections	Selenomonas	9.07546
Allergy	Proteobacteria	9.05308
Atopic dermatitis	Bacteroidetes	9.05232
Inflammatory bowel disease(IBD)	Staphylococcus aureus	9.04548
Cystic fibrosis	Fusobacterium nucleatum	9.04438
Cystic fibrosis	Prevotellaceae	9.01133
Allergic asthma	Lachnospiraceae	9.00135
Allergic sensitization	Escherichia coli	8.9977
Infectious colitis	Escherichia coli	8.9977
Colon cancer	Escherichia coli	8.9977
Constipation Irritable bowel syndrome(IBS)	Escherichia coli	8.9977
Recurrent wheeze	Escherichia coli	8.9977
Systemic inflammatory response syndrome	Escherichia coli	8.9977
Atopic sensitisation	Escherichia coli	8.9977
Guttate psoriasis	Escherichia coli	8.9977
Whipple's disease	Escherichia coli	8.9977
Kidney stones	Escherichia coli	8.96892
Type 2 diabetes	Klebsiella	8.9688
Asthma	Faecalibacterium prausnitzii	8.95906
COPD	Faecalibacterium prausnitzii	8.95906
Allergy	Clostridium coccoides	8.94787
Necrotizing Enterocolitis	Alistipes	8.92637
Necrotizing Enterocolitis	Parabacteroides	8.92637
Ileal Crohn's disease(CD)	Firmicutes	8.91923
COPD	Clostridium	8.91641
Asthma	Clostridium	8.91641
Skin and mucosal infections	Staphylococcus aureus	8.91373
Skin and mucosal infections	Methanobrevibacter smithii	8.89184
Skin and mucosal infections	Coriobacteriaceae	8.89184
Skin and mucosal infections	Alcaligenaceae	8.89184
Skin and mucosal infections	Fusobacterium nucleatum	8.89184
Skin and mucosal infections	Erysipelotrichaceae	8.89184
Skin and mucosal infections	Atopobium	8.87418
Skin and mucosal infections	Streptobacillus	8.87418
Skin and mucosal infections	Candidate division TM7	8.87418
Skin and mucosal infections	Olsenella	8.87418
Skin and mucosal infections	Aerococcus	8.87418
Skin and mucosal infections	Papillibacter	8.87418
Skin and mucosal infections	Shuttleworthia	8.87418
Skin and mucosal infections	Mobiluncus	8.87418
Skin and mucosal infections	Porphyromonas uenonis	8.87418
Skin and mucosal infections	Atopobium vaginae	8.87418
Skin and mucosal infections	Veillonellaceae	8.87418
Skin and mucosal infections	Lactobacillus crispatus	8.87418
Skin and mucosal infections	Leptotrichia amnionii	8.87418
Skin and mucosal infections	Leptotrichia	8.87418
Skin and mucosal infections	Lactobacillus iners	8.87418
Skin and mucosal infections	Eggerthella	8.87418
Skin and mucosal infections	Enterococcus faecium	8.87418
Skin and mucosal infections	Gardnerella vaginalis	8.87418
Skin and mucosal infections	Gardnerella	8.87418
Skin and mucosal infections	Bacteroidales	8.87418
Skin and mucosal infections	Erysipelotrichales	8.87418
Skin and mucosal infections	Fusobacteriaceae	8.87418
Allergy	Lachnospiraceae	8.868
Necrotizing Enterocolitis	Betaproteobacteria	8.8527
Atopy	Proteobacteria	8.84856
Ileal Crohn's disease(CD)	Haemophilus	8.8434
Psoriasis	Bacteroides vulgatus	8.83175
Allergic asthma	Prevotella	8.83101
Colon cancer	Staphylococcus aureus	8.82215
Cystic fibrosis	Clostridium difficile	8.82198
Ulcerative colitis	Lachnospiraceae	8.82182
Inflammatory bowel disease(IBD)	Enterococcus	8.79926
Periodontal	Faecalibacterium prausnitzii	8.79838
Colorectal carcinoma	Escherichia coli	8.79731
Gastric and duodenal ulcer	Staphylococcus aureus	8.79677
Obesity	Staphylococcus	8.79203
Allergy	Staphylococcus aureus	8.78944
Obesity	Fusobacterium	8.78524
Ileal Crohn's disease(CD)	Helicobacter pylori	8.78145
Atopic dermatitis	Prevotella	8.77578
Gastric and duodenal ulcer	Prevotella	8.76429
Allergy	Prevotella	8.75696
Ileal Crohn's disease(CD)	Clostridiales	8.74167
Atopic dermatitis	Bifidobacterium	8.72461
Atopic dermatitis	Proteobacteria	8.72188
Periodontal	Betaproteobacteria	8.71409
Atopy	Staphylococcus aureus	8.67212
Type 2 diabetes	Bacteroides uniformis	8.65656
Ileal Crohn's disease(CD)	Klebsiella	8.64949
Type 2 diabetes	Enterobacteriaceae	8.64041
Cystic fibrosis	Streptococcus	8.63356
Gastric and duodenal ulcer	Proteobacteria	8.63353
Gastro-oesophageal reflux	Proteobacteria	8.63353
Atopy	Betaproteobacteria	8.63014
Inflammatory bowel disease(IBD)	Betaproteobacteria	8.63014
Gastric and duodenal ulcer	Bifidobacterium	8.62979
Ulcerative colitis	Bifidobacterium	8.62979
Inflammatory bowel disease(IBD)	Bifidobacterium	8.62979
Atopy	Bifidobacterium	8.62979
Atopic sensitisation	Bifidobacterium	8.62979
Allergy	Bifidobacterium	8.60882
Psoriasis	Enterobacteriaceae	8.57432
Skin and mucosal infections	Enterococcus	8.5613
Asthma	Pseudomonas	8.55894
Type 1 diabetes	Propionibacterium acnes	8.55242
Type 1 diabetes	Propionibacterium	8.55242
Allergic sensitization	Clostridium coccoides	8.52832
Gastro-oesophageal reflux	Clostridium coccoides	8.52832
Diarrhea Irritable bowel syndrome(IBS)	Clostridium coccoides	8.52832
Guttate psoriasis	Clostridium coccoides	8.52832
Eczema	Clostridium coccoides	8.52832
Atopic sensitisation	Clostridium coccoides	8.52832
Gastric and duodenal ulcer	Clostridium coccoides	8.52832
Constipation Irritable bowel syndrome(IBS)	Clostridium coccoides	8.52832
Infectious colitis	Clostridium coccoides	8.52832
Recurrent wheeze	Clostridium coccoides	8.52832
Atopy	Clostridium coccoides	8.52832
Diarrhea Irritable bowel syndrome(IBS)	Escherichia coli	8.52326
Type 1 diabetes	Staphylococcus epidermidis	8.51819
Type 1 diabetes	Dietzia maris	8.51819
Necrotizing Enterocolitis	Fusobacterium	8.50031
Colorectal carcinoma	Clostridiales	8.49752
Irritable bowel syndrome(IBS)	Shigella dysenteriae	8.49476
Irritable bowel syndrome(IBS)	Enterobacter aerogenes	8.49476
Irritable bowel syndrome(IBS)	Enterobacter hormaechei	8.49476
Irritable bowel syndrome(IBS)	Klebsiella pneumoniae	8.49476
Cystic fibrosis	Clostridium	8.49133
Psoriasis	Betaproteobacteria	8.48875
Irritable bowel syndrome(IBS)	Clostridium leptum	8.47699
Periodontal	Clostridium	8.47277
Cystic fibrosis	Staphylococcus epidermidis	8.46677
Cystic fibrosis	Dietzia maris	8.46677
New-onset untreated rheumatoid arthrits	Clostridium coccoides	8.46419
Irritable bowel syndrome(IBS)	Bacteroidales	8.46291
Irritable bowel syndrome(IBS)	Erysipelotrichales	8.46291
Irritable bowel syndrome(IBS)	Enterococcus faecium	8.46291
COPD	Staphylococcus	8.45855
Guttate psoriasis	Lachnospiraceae	8.44845
Constipation Irritable bowel syndrome(IBS)	Lachnospiraceae	8.44845
Gastric and duodenal ulcer	Lachnospiraceae	8.44845
Atopy	Lachnospiraceae	8.44845
Eczema	Lachnospiraceae	8.44845
Gastro-oesophageal reflux	Lachnospiraceae	8.44845
Recurrent wheeze	Lachnospiraceae	8.44845
Rheumatoid arthrits	Lachnospiraceae	8.44845
Infectious colitis	Lachnospiraceae	8.44845
Diarrhea Irritable bowel syndrome(IBS)	Lachnospiraceae	8.44845
Atopic sensitisation	Lachnospiraceae	8.44845
Allergic sensitization	Lachnospiraceae	8.44845
Asthma	Burkholderia	8.43815
Kidney stones	Lachnospiraceae	8.41535
New-onset untreated rheumatoid arthrits	Lachnospiraceae	8.38431
Bacterial Vaginosis	Helicobacter pylori	8.38162
Irritable bowel syndrome(IBS)	Lactobacillus	8.37396
Systemic inflammatory response syndrome	Prevotella	8.36957
Irritable bowel syndrome(IBS)	Firmicutes	8.36556
Periodontal	Actinobacteria	8.34918
Periodontal	Helicobacter pylori	8.34167
Bacterial Vaginosis	Ruminococcaceae	8.34049
Bacterial Vaginosis	Rikenellaceae	8.34049
Allergic asthma	Desulfovibrio	8.33053
Whipple's disease	Bacteroides ovatus	8.32069
Crohn's disease(CD)	Lactobacillus	8.29928
Asthma	Fusobacterium	8.2961
Ileal Crohn's disease(CD)	Actinobacteria	8.27486
Crohn's disease(CD)	Porphyromonadaceae	8.26223
Periodontal	Bacteroides vulgatus	8.26008
Necrotizing Enterocolitis	Haemophilus	8.24321
Type 2 diabetes	Haemophilus	8.24321
Necrotizing Enterocolitis	Escherichia coli	8.23601
Irritable bowel syndrome(IBS)	Faecalibacterium prausnitzii	8.23197
Asthma	Bacilli	8.22679
Allergic sensitization	Proteobacteria	8.21997
Constipation Irritable bowel syndrome(IBS)	Proteobacteria	8.21997
Atopic sensitisation	Proteobacteria	8.21997
Diarrhea Irritable bowel syndrome(IBS)	Proteobacteria	8.21997
Infectious colitis	Proteobacteria	8.21997
Recurrent wheeze	Proteobacteria	8.21997
Eczema	Proteobacteria	8.21997
Guttate psoriasis	Proteobacteria	8.21997
Skin and mucosal infections	Clostridium leptum	8.21663
Colorectal carcinoma	Bacilli	8.19814
Colorectal carcinoma	Veillonellaceae	8.19755
Colorectal carcinoma	Fusobacteriaceae	8.19755
Cystic fibrosis	Actinobacteria	8.19396
Atopic dermatitis	Clostridiales	8.19069
Guttate psoriasis	Bifidobacterium	8.18927
Gastro-oesophageal reflux	Bifidobacterium	8.18927
Allergic sensitization	Bifidobacterium	8.18927
Infectious colitis	Bifidobacterium	8.18927
Systemic inflammatory response syndrome	Bifidobacterium	8.18927
Constipation Irritable bowel syndrome(IBS)	Bifidobacterium	8.18927
Recurrent wheeze	Bifidobacterium	8.18927
COPD	Staphylococcus aureus	8.18731
Kidney stones	Proteobacteria	8.18686
Irritable bowel syndrome(IBS)	Burkholderia	8.17586
Clostridium difficile infection(CDI)	Bacteroides vulgatus	8.16143
Colon cancer	Proteobacteria	8.15583
New-onset untreated rheumatoid arthrits	Proteobacteria	8.15583
Ulcerative colitis	Staphylococcus aureus	8.14699
Colorectal carcinoma	Helicobacter pylori	8.12709
Clostridium difficile infection(CDI)	Clostridium leptum	8.11424
Asthma	Clostridiales	8.09908
Clostridium difficile infection(CDI)	Fusobacteria	8.09797
Atopic dermatitis	Streptococcus	8.09451
Type 2 diabetes	Escherichia coli	8.08172
Colorectal carcinoma	Alistipes	8.0772
Crohn's disease(CD)	Alistipes	8.0772
Crohn's disease(CD)	Parabacteroides	8.0772
Periodontal	Alistipes	8.0772
Periodontal	Parabacteroides	8.0772
Colorectal carcinoma	Parabacteroides	8.0772
COPD	Bacilli	8.07249
Type 1 diabetes	Prevotellaceae	8.06811
Obesity	Bacteroides	8.06796
Crohn's disease(CD)	Fusobacterium	8.055
Skin and mucosal infections	Streptococcus	8.04466
Necrotizing Enterocolitis	Bacteroides uniformis	8.03221
Allergic sensitization	Bacteroidetes	8.00925
Infectious colitis	Bacteroidetes	8.00925
Colon cancer	Bacteroidetes	8.00925
Eczema	Bacteroidetes	8.00925
Diarrhea Irritable bowel syndrome(IBS)	Bacteroidetes	8.00925
Allergy	Bacteroidetes	8.00925
Whipple's disease	Bacteroidetes	8.00925
Atopy	Bacteroidetes	8.00925
Guttate psoriasis	Bacteroidetes	8.00925
New-onset untreated rheumatoid arthrits	Bacteroidetes	8.00925
Constipation Irritable bowel syndrome(IBS)	Bacteroidetes	8.00925
Gastric and duodenal ulcer	Bacteroidetes	8.00925
Atopic sensitisation	Bacteroidetes	8.00925
Gastro-oesophageal reflux	Bacteroidetes	8.00925
Recurrent wheeze	Bacteroidetes	8.00925
Allergic asthma	Bacteroidetes	8.00925
Type 1 diabetes	Enterococcus	8.00319
Skin and mucosal infections	Prevotella copri	7.97648
Kidney stones	Bacteroidetes	7.97614
Liver cirrhosis	Staphylococcus epidermidis	7.97599
Liver cirrhosis	Dietzia maris	7.97599
Irritable bowel syndrome(IBS)	Staphylococcus epidermidis	7.97557
Irritable bowel syndrome(IBS)	Dietzia maris	7.97557
Rheumatoid arthrits	Enterococcus	7.97436
COPD	Clostridiales	7.94478
Crohn's disease(CD)	Betaproteobacteria	7.94367
Cystic fibrosis	Bacteroides fragilis	7.9396
Gastro-oesophageal reflux	Staphylococcus aureus	7.93299
Periodontal	Bacilli	7.92352
Obesity	Clostridium	7.92108
Systemic inflammatory response syndrome	Streptococcus	7.91122
Inflammatory bowel disease(IBD)	Streptococcus	7.91122
Ulcerative colitis	Enterococcus	7.90077
Recurrent wheeze	Prevotella	7.90051
Gastro-oesophageal reflux	Prevotella	7.90051
Constipation Irritable bowel syndrome(IBS)	Prevotella	7.90051
Allergic sensitization	Prevotella	7.90051
Guttate psoriasis	Prevotella	7.90051
Infectious colitis	Prevotella	7.90051
Ileal Crohn's disease(CD)	Bacteroides	7.89472
Cystic fibrosis	Desulfovibrio	7.86535
Kidney stones	Prevotella	7.86004
Rheumatoid arthrits	Firmicutes	7.85404
Psoriasis	Pseudomonas	7.848
Asthma	Staphylococcus aureus	7.84771
Rheumatoid arthrits	Staphylococcus aureus	7.84721
Type 1 diabetes	Pseudomonas	7.83983
Liver cirrhosis	Burkholderia	7.83678
Irritable bowel syndrome(IBS)	Rikenellaceae	7.83584
Irritable bowel syndrome(IBS)	Ruminococcaceae	7.83584
Ileal Crohn's disease(CD)	Veillonellaceae	7.83368
Ileal Crohn's disease(CD)	Fusobacteriaceae	7.83368
Liver cirrhosis	Rikenellaceae	7.82962
Liver cirrhosis	Ruminococcaceae	7.82962
Colorectal carcinoma	Haemophilus	7.81612
Clostridium difficile infection(CDI)	Eubacteriaceae	7.81399
Type 1 diabetes	Staphylococcus aureus	7.81119
Psoriasis	Enterococcus	7.77886
Ileal Crohn's disease(CD)	Fusobacterium	7.77601
Liver cirrhosis	Actinobacteria	7.75599
Cystic fibrosis	Treponema	7.74178
Cystic fibrosis	Selenomonas	7.74178
Cystic fibrosis	Actinomyces	7.74178
Cystic fibrosis	Porphyromonas gingivalis	7.74178
Eczema	Bifidobacterium	7.71483
Bacterial Vaginosis	Porphyromonadaceae	7.69933
Cystic fibrosis	Clostridium leptum	7.68862
Type 2 diabetes	Helicobacter pylori	7.68658
Kidney stones	Bifidobacterium	7.66422
Psoriasis	Bacilli	7.62956
Necrotizing Enterocolitis	Faecalibacterium prausnitzii	7.62587
Type 2 diabetes	Staphylococcus	7.62384
Cystic fibrosis	Porphyromonas uenonis	7.602
Cystic fibrosis	Gardnerella vaginalis	7.602
Cystic fibrosis	Gardnerella	7.602
Cystic fibrosis	Lactobacillus iners	7.602
Cystic fibrosis	Lactobacillus crispatus	7.602
Cystic fibrosis	Streptobacillus	7.602
Cystic fibrosis	Mobiluncus	7.602
Cystic fibrosis	Olsenella	7.602
Cystic fibrosis	Leptotrichia	7.602
Cystic fibrosis	Leptotrichia amnionii	7.602
Cystic fibrosis	Papillibacter	7.602
Cystic fibrosis	Candidate division TM7	7.602
Cystic fibrosis	Aerococcus	7.602
Cystic fibrosis	Atopobium vaginae	7.602
Cystic fibrosis	Atopobium	7.602
Cystic fibrosis	Eggerthella	7.602
Eczema	Streptococcus	7.58733
Allergic asthma	Streptococcus	7.58733
Rheumatoid arthrits	Streptococcus	7.58733
Guttate psoriasis	Streptococcus	7.58733
Allergy	Streptococcus	7.58733
Ulcerative colitis	Streptococcus	7.58733
Gastro-oesophageal reflux	Streptococcus	7.58733
Allergic sensitization	Streptococcus	7.58733
Atopic sensitisation	Streptococcus	7.58733
Gastric and duodenal ulcer	Streptococcus	7.58733
Recurrent wheeze	Streptococcus	7.58733
Cystic fibrosis	Bacteroides	7.57219
Skin and mucosal infections	Megasphaera	7.56213
Skin and mucosal infections	Bacteroides ovatus	7.54741
Asthma	Bifidobacterium	7.53314
Obesity	Bacteroides vulgatus	7.53169
Allergic sensitization	Staphylococcus aureus	7.51942
Recurrent wheeze	Staphylococcus aureus	7.51942
Bacterial Vaginosis	Fusobacterium	7.4945
Colon cancer	Bifidobacterium	7.49231
Atopic sensitisation	Betaproteobacteria	7.48497
Irritable bowel syndrome(IBS)	Clostridium	7.42866
Eczema	Prevotella	7.42607
Diarrhea Irritable bowel syndrome(IBS)	Prevotella	7.42607
Skin and mucosal infections	Tropheryma whipplei	7.42296
Allergic asthma	Bacteroides ovatus	7.40984
Necrotizing Enterocolitis	Porphyromonadaceae	7.39951
Atopic dermatitis	Helicobacter pylori	7.39851
Kidney stones	Clostridium coccoides	7.39209
Cystic fibrosis	Oxalobacter formigenes	7.37173
Cystic fibrosis	Corynebacterium	7.37173
Cystic fibrosis	Tropheryma whipplei	7.37173
Cystic fibrosis	Acinetobacter	7.37173
Cystic fibrosis	Prevotella copri	7.36954
Crohn's disease(CD)	Staphylococcus epidermidis	7.35389
Crohn's disease(CD)	Dietzia maris	7.35389
Skin and mucosal infections	Tannerella	7.32483
Diarrhea Irritable bowel syndrome(IBS)	Betaproteobacteria	7.31808
Rheumatoid arthrits	Betaproteobacteria	7.31808
Ulcerative colitis	Betaproteobacteria	7.31808
Systemic inflammatory response syndrome	Betaproteobacteria	7.31808
Skin and mucosal infections	Sphingomonadaceae	7.29484
Skin and mucosal infections	Pseudomonas	7.29484
Skin and mucosal infections	Oxalobacteraceae	7.29484
Skin and mucosal infections	Comamonadaceae	7.29484
Type 1 diabetes	Clostridium difficile	7.27149
Cystic fibrosis	Shuttleworthia	7.23294
Type 1 diabetes	Rickettsiales	7.18885
Type 1 diabetes	Streptococcus mitis	7.18885
Type 1 diabetes	Xanthomonas	7.18885
Type 1 diabetes	Lysobacter	7.18885
Type 2 diabetes	Fusobacterium	7.18826
Crohn's disease(CD)	Bacilli	7.17931
Psoriasis	Enterococcus faecium	7.14212
Psoriasis	Bacteroidales	7.14212
Psoriasis	Erysipelotrichales	7.14212
Rheumatoid arthrits	Desulfovibrio	7.13148
Colorectal carcinoma	Porphyromonadaceae	7.11706
Skin and mucosal infections	Propionibacterium	7.11123
Skin and mucosal infections	Propionibacterium acnes	7.11123
Skin and mucosal infections	Bacilli	7.10761
New-onset untreated rheumatoid arthrits	Escherichia coli	7.10616
Psoriasis	Bacteroides	7.09976
Type 2 diabetes	Enterococcus	7.07987
Obesity	Fusobacteriaceae	7.07911
Obesity	Veillonellaceae	7.07911
Eczema	Staphylococcus aureus	7.04498
Allergy	Desulfovibrio	7.03693
Type 2 diabetes	Porphyromonadaceae	7.01276
Periodontal	Rikenellaceae	7.00234
Periodontal	Ruminococcaceae	7.00234
Colorectal carcinoma	Fusobacteria	6.99796
Ileal Crohn's disease(CD)	Betaproteobacteria	6.96822
Clostridium difficile infection(CDI)	Enterococcus faecium	6.96612
Clostridium difficile infection(CDI)	Bacteroidales	6.96612
Clostridium difficile infection(CDI)	Erysipelotrichales	6.96612
Clostridium difficile infection(CDI)	Staphylococcus	6.9503
Bacterial Vaginosis	Bacteroidaceae	6.95017
Cystic fibrosis	Bacteroidales	6.93385
Cystic fibrosis	Enterococcus faecium	6.93385
Cystic fibrosis	Erysipelotrichales	6.93385
Type 2 diabetes	Eubacteriaceae	6.92793
Crohn's disease(CD)	Eubacteriaceae	6.92793
Constipation Irritable bowel syndrome(IBS)	Staphylococcus aureus	6.91955
Infectious colitis	Staphylococcus aureus	6.91955
Systemic inflammatory response syndrome	Staphylococcus aureus	6.91955
Liver cirrhosis	Bacteroides vulgatus	6.90462
Atopy	Enterococcus	6.90152
Cystic fibrosis	Porphyromonas	6.89002
Kidney stones	Staphylococcus aureus	6.88917
Psoriasis	Burkholderia	6.87661
Type 2 diabetes	Bacteroides ovatus	6.86288
Necrotizing Enterocolitis	Bacteroides ovatus	6.86288
Clostridium difficile infection(CDI)	Fusobacterium	6.84153
Type 2 diabetes	Clostridiales	6.83694
Psoriasis	Staphylococcus aureus	6.83511
Cystic fibrosis	Erysipelotrichaceae	6.81451
Cystic fibrosis	Alcaligenaceae	6.81451
Cystic fibrosis	Methanobrevibacter smithii	6.81451
Cystic fibrosis	Coriobacteriaceae	6.81451
Systemic inflammatory response syndrome	Porphyromonadaceae	6.78865
Type 1 diabetes	Oxalobacteraceae	6.78252
Type 1 diabetes	Comamonadaceae	6.78252
Type 1 diabetes	Sphingomonadaceae	6.78252
Irritable bowel syndrome(IBS)	Enterococcus	6.78181
Liver cirrhosis	Clostridium leptum	6.78159
Liver cirrhosis	Collinsella aerofaciens	6.77048
Liver cirrhosis	Erysipelotrichales	6.76751
Liver cirrhosis	Bacteroidales	6.76751
Liver cirrhosis	Enterococcus faecium	6.76751
Irritable bowel syndrome(IBS)	Tannerella	6.74194
Atopic sensitisation	Helicobacter pylori	6.73461
Obesity	Burkholderia	6.72951
Whipple's disease	Dietzia maris	6.72477
Whipple's disease	Staphylococcus epidermidis	6.72477
Irritable bowel syndrome(IBS)	Megasphaera	6.72189
Colorectal carcinoma	Pseudomonas	6.71064
Ulcerative colitis	Helicobacter pylori	6.70727
Obesity	Ruminococcaceae	6.70198
Obesity	Rikenellaceae	6.70198
Irritable bowel syndrome(IBS)	Stenotrophomonas maltophilia	6.69454
Irritable bowel syndrome(IBS)	Staphylococcus aureus	6.69454
Cystic fibrosis	Staphylococcus	6.69311
Asthma	Fusobacteriaceae	6.66507
Asthma	Veillonellaceae	6.66507
Type 2 diabetes	Bacteroides	6.64525
Bacterial Vaginosis	Staphylococcus	6.64483
Cystic fibrosis	Ruminococcaceae	6.63798
Cystic fibrosis	Rikenellaceae	6.63798
Allergic asthma	Clostridium difficile	6.63628
Gastric and duodenal ulcer	Desulfovibrio	6.61738
Eczema	Desulfovibrio	6.61738
Allergic sensitization	Desulfovibrio	6.61738
Inflammatory bowel disease(IBD)	Desulfovibrio	6.61738
Recurrent wheeze	Desulfovibrio	6.61738
Systemic inflammatory response syndrome	Desulfovibrio	6.61738
Ulcerative colitis	Desulfovibrio	6.61738
Constipation Irritable bowel syndrome(IBS)	Desulfovibrio	6.61738
Gastro-oesophageal reflux	Desulfovibrio	6.61738
Guttate psoriasis	Desulfovibrio	6.61738
Infectious colitis	Desulfovibrio	6.61738
Atopy	Desulfovibrio	6.61738
Atopic sensitisation	Desulfovibrio	6.61738
Periodontal	Clostridium leptum	6.61004
Allergy	Betaproteobacteria	6.60981
Cystic fibrosis	Clostridia	6.60338
Gastric and duodenal ulcer	Betaproteobacteria	6.59618
Crohn's disease(CD)	Clostridium	6.59451
Periodontal	Bacteroidales	6.58771
Periodontal	Erysipelotrichales	6.58771
Periodontal	Enterococcus faecium	6.58771
Atopic dermatitis	Desulfovibrio	6.57515
Ileal Crohn's disease(CD)	Lactobacillus	6.56436
Cystic fibrosis	Alistipes	6.56107
Cystic fibrosis	Parabacteroides	6.56107
Skin and mucosal infections	Bacteroides vulgatus	6.55895
Skin and mucosal infections	Bacteroides fragilis	6.55895
Skin and mucosal infections	Porphyromonas	6.55895
Clostridium difficile infection(CDI)	Pseudomonas	6.55843
Type 2 diabetes	Pseudomonas	6.55634
Ileal Crohn's disease(CD)	Porphyromonadaceae	6.55412
Periodontal	Porphyromonadaceae	6.55412
Clostridium difficile infection(CDI)	Enterococcus	6.54939
Type 2 diabetes	Veillonellaceae	6.53697
Type 2 diabetes	Fusobacteriaceae	6.53697
Necrotizing Enterocolitis	Burkholderia	6.53538
Atopic dermatitis	Betaproteobacteria	6.52395
Psoriasis	Fusobacterium nucleatum	6.51115
COPD	Fusobacteriaceae	6.51077
COPD	Veillonellaceae	6.51077
Cystic fibrosis	Comamonadaceae	6.51005
Cystic fibrosis	Oxalobacteraceae	6.51005
Cystic fibrosis	Sphingomonadaceae	6.51005
Whipple's disease	Stenotrophomonas maltophilia	6.47129
Whipple's disease	Clostridium difficile	6.46043
Whipple's disease	Helicobacter pylori	6.46043
Asthma	Fusobacterium nucleatum	6.45799
Bacterial Vaginosis	Pseudomonas	6.44912
Skin and mucosal infections	Burkholderia	6.44847
Liver cirrhosis	Pseudomonas	6.44679
Diarrhea Irritable bowel syndrome(IBS)	Staphylococcus aureus	6.44511
COPD	Clostridia	6.42901
Cystic fibrosis	Tannerella	6.42744
Ileal Crohn's disease(CD)	Faecalibacterium prausnitzii	6.42236
Rheumatoid arthrits	Helicobacter pylori	6.40749
Type 1 diabetes	Collinsella aerofaciens	6.40372
Clostridium difficile infection(CDI)	Fusobacterium nucleatum	6.37434
Necrotizing Enterocolitis	Eubacteriaceae	6.36625
Systemic inflammatory response syndrome	Bacteroides	6.35608
Liver cirrhosis	Staphylococcus aureus	6.35547
Liver cirrhosis	Enterococcus	6.34172
Crohn's disease(CD)	Staphylococcus aureus	6.33255
COPD	Fusobacterium nucleatum	6.30369
Colorectal carcinoma	Burkholderia	6.28819
Psoriasis	Sphingomonadaceae	6.27859
Psoriasis	Oxalobacteraceae	6.27859
Psoriasis	Comamonadaceae	6.27859
Liver cirrhosis	Fusobacterium nucleatum	6.2627
Psoriasis	Porphyromonadaceae	6.26234
Irritable bowel syndrome(IBS)	Fusobacterium nucleatum	6.26228
Irritable bowel syndrome(IBS)	Porphyromonas	6.26066
Clostridium difficile infection(CDI)	Burkholderia	6.26063
Crohn's disease(CD)	Bifidobacterium	6.25842
Recurrent wheeze	Bacteroides ovatus	6.24959
Allergy	Bacteroides ovatus	6.24959
Gastro-oesophageal reflux	Bacteroides ovatus	6.24959
Guttate psoriasis	Bacteroides ovatus	6.24959
Systemic inflammatory response syndrome	Bacteroides ovatus	6.24959
Gastric and duodenal ulcer	Bacteroides ovatus	6.24959
Allergic sensitization	Bacteroides ovatus	6.24959
Atopic sensitisation	Bacteroides ovatus	6.24959
Constipation Irritable bowel syndrome(IBS)	Bacteroides ovatus	6.24959
Infectious colitis	Bacteroides ovatus	6.24959
Colon cancer	Bacteroides ovatus	6.24959
Inflammatory bowel disease(IBD)	Bacteroides ovatus	6.24959
Atopy	Bacteroides ovatus	6.24959
Colorectal carcinoma	Bacteroides vulgatus	6.21301
Crohn's disease(CD)	Burkholderia	6.21275
Kidney stones	Bacteroides ovatus	6.20861
Colorectal carcinoma	Staphylococcus aureus	6.20793
Type 1 diabetes	Prevotella copri	6.20681
Type 1 diabetes	Desulfovibrio	6.20681
Type 1 diabetes	Corynebacterium	6.20681
Type 1 diabetes	Tropheryma whipplei	6.20681
Type 1 diabetes	Oxalobacter formigenes	6.20681
Type 1 diabetes	Acinetobacter	6.20681
Ileal Crohn's disease(CD)	Bacilli	6.20385
Crohn's disease(CD)	Enterococcus	6.18937
Infectious colitis	Porphyromonadaceae	6.18919
Necrotizing Enterocolitis	Fusobacteria	6.18578
Skin and mucosal infections	Prevotellaceae	6.17812
Constipation Irritable bowel syndrome(IBS)	Betaproteobacteria	6.17291
Infectious colitis	Betaproteobacteria	6.17291
Eczema	Betaproteobacteria	6.17291
Recurrent wheeze	Betaproteobacteria	6.17291
New-onset untreated rheumatoid arthrits	Betaproteobacteria	6.17291
Guttate psoriasis	Betaproteobacteria	6.17291
Gastro-oesophageal reflux	Betaproteobacteria	6.17291
Colon cancer	Betaproteobacteria	6.17291
Allergic asthma	Betaproteobacteria	6.17291
Allergic sensitization	Betaproteobacteria	6.17291
Whipple's disease	Betaproteobacteria	6.17291
Necrotizing Enterocolitis	Bacteroidaceae	6.16736
Type 1 diabetes	Stenotrophomonas maltophilia	6.1587
Irritable bowel syndrome(IBS)	Clostridium difficile	6.15483
Bacterial Vaginosis	Burkholderia	6.15319
Kidney stones	Desulfovibrio	6.09718
Crohn's disease(CD)	Collinsella aerofaciens	6.08807
Psoriasis	Ruminococcaceae	6.07293
Psoriasis	Rikenellaceae	6.07293
COPD	Bifidobacterium	6.05051
Type 1 diabetes	Burkholderia	6.04658
Obesity	Bifidobacterium	6.03352
Inflammatory bowel disease(IBD)	Helicobacter pylori	6.0319
Psoriasis	Bifidobacterium	6.02691
Infectious colitis	Eubacteriaceae	6.02367
Irritable bowel syndrome(IBS)	Pseudomonas	6.0195
New-onset untreated rheumatoid arthrits	Streptococcus	6.01348
Diarrhea Irritable bowel syndrome(IBS)	Streptococcus	6.01348
Constipation Irritable bowel syndrome(IBS)	Streptococcus	6.01348
Infectious colitis	Streptococcus	6.01348
Whipple's disease	Streptococcus	6.01348
Atopy	Streptococcus	6.01348
Colon cancer	Streptococcus	6.01348
Obesity	Betaproteobacteria	5.99151
Kidney stones	Streptococcus	5.98037
COPD	Enterobacteriaceae	5.94492
COPD	Klebsiella	5.94489
Asthma	Enterobacteriaceae	5.94138
Colon cancer	Desulfovibrio	5.92042
Crohn's disease(CD)	Bacteroidaceae	5.91766
Type 2 diabetes	Bacteroidaceae	5.91766
Obesity	Pseudomonas	5.90304
Necrotizing Enterocolitis	Lactobacillus	5.89598
Ileal Crohn's disease(CD)	Ruminococcaceae	5.8945
Ileal Crohn's disease(CD)	Rikenellaceae	5.8945
Liver cirrhosis	Stenotrophomonas maltophilia	5.88108
Irritable bowel syndrome(IBS)	Actinobacteria	5.85959
Obesity	Clostridium leptum	5.85031
Liver cirrhosis	Prevotellaceae	5.84749
Clostridium difficile infection(CDI)	Staphylococcus epidermidis	5.84574
Clostridium difficile infection(CDI)	Dietzia maris	5.84574
Ulcerative colitis	Firmicutes	5.83744
Psoriasis	Clostridium leptum	5.82195
Liver cirrhosis	Clostridium difficile	5.81576
Irritable bowel syndrome(IBS)	Clostridia	5.79911
Irritable bowel syndrome(IBS)	Selenomonas	5.79062
Irritable bowel syndrome(IBS)	Treponema	5.79062
Irritable bowel syndrome(IBS)	Porphyromonas gingivalis	5.79062
Irritable bowel syndrome(IBS)	Actinomyces	5.79062
Gastric and duodenal ulcer	Clostridium difficile	5.78692
Asthma	Eubacteriaceae	5.78276
Obesity	Eubacteriaceae	5.78276
Allergy	Clostridium difficile	5.77959
Skin and mucosal infections	Helicobacter pylori	5.77203
Type 2 diabetes	Burkholderia	5.69338
Bacterial Vaginosis	Enterococcus	5.68478
Obesity	Bacilli	5.6846
Periodontal	Staphylococcus	5.67288
Obesity	Enterococcus	5.6714
Ileal Crohn's disease(CD)	Clostridium	5.61906
Psoriasis	Clostridia	5.61131
Bacterial Vaginosis	Bacteroides fragilis	5.60392
Psoriasis	Selenomonas	5.58895
Psoriasis	Actinomyces	5.58895
Psoriasis	Porphyromonas gingivalis	5.58895
Psoriasis	Treponema	5.58895
Ileal Crohn's disease(CD)	Enterococcus	5.57948
Whipple's disease	Collinsella aerofaciens	5.57715
Whipple's disease	Burkholderia	5.56542
Clostridium difficile infection(CDI)	Citrobacter	5.55029
Bacterial Vaginosis	Citrobacter	5.55029
Type 1 diabetes	Actinomyces	5.54054
Type 1 diabetes	Selenomonas	5.54054
Type 1 diabetes	Treponema	5.54054
Type 1 diabetes	Porphyromonas gingivalis	5.54054
Clostridium difficile infection(CDI)	Bifidobacterium	5.53621
Skin and mucosal infections	Bacteroides uniformis	5.53304
Allergic asthma	Bacteroides uniformis	5.51623
Cystic fibrosis	Bacteroidaceae	5.51318
Asthma	Bacteroidaceae	5.51318
Crohn's disease(CD)	Staphylococcus	5.5123
Skin and mucosal infections	Faecalibacterium prausnitzii	5.50929
Skin and mucosal infections	Lactobacillus	5.50929
Skin and mucosal infections	Clostridium	5.50929
New-onset untreated rheumatoid arthrits	Desulfovibrio	5.48796
New-onset untreated rheumatoid arthrits	Prevotella	5.4757
Crohn's disease(CD)	Fusobacterium nucleatum	5.47393
Psoriasis	Dietzia maris	5.46947
Psoriasis	Staphylococcus epidermidis	5.46947
Irritable bowel syndrome(IBS)	Streptococcus mitis	5.46341
Irritable bowel syndrome(IBS)	Rickettsiales	5.46341
Irritable bowel syndrome(IBS)	Lysobacter	5.46341
Irritable bowel syndrome(IBS)	Xanthomonas	5.46341
Atopy	Eubacteriaceae	5.46073
Inflammatory bowel disease(IBD)	Burkholderia	5.45915
Whipple's disease	Enterococcus	5.44628
Skin and mucosal infections	Stenotrophomonas maltophilia	5.44413
Skin and mucosal infections	Coxiellaceae	5.44413
Psoriasis	Porphyromonas	5.43775
Necrotizing Enterocolitis	Staphylococcus aureus	5.42697
Inflammatory bowel disease(IBD)	Firmicutes	5.42387
Infectious colitis	Fusobacteria	5.39602
Obesity	Porphyromonadaceae	5.39069
Infectious colitis	Alistipes	5.38717
Infectious colitis	Parabacteroides	5.38717
Colorectal carcinoma	Bifidobacterium	5.38318
Asthma	Bacteroides vulgatus	5.37405
Liver cirrhosis	Coxiellaceae	5.3701
Liver cirrhosis	Clostridia	5.35902
Asthma	Selenomonas	5.35823
Asthma	Actinomyces	5.35823
Asthma	Treponema	5.35823
Asthma	Porphyromonas gingivalis	5.35823
COPD	Oxalobacteraceae	5.35259
COPD	Sphingomonadaceae	5.35259
COPD	Comamonadaceae	5.35259
Asthma	Ruminococcaceae	5.34818
Asthma	Rikenellaceae	5.34818
Liver cirrhosis	Porphyromonas	5.34576
Crohn's disease(CD)	Fusobacteria	5.34547
Periodontal	Fusobacteria	5.34547
Skin and mucosal infections	Collinsella aerofaciens	5.34159
Crohn's disease(CD)	Stenotrophomonas maltophilia	5.33838
Necrotizing Enterocolitis	Bacilli	5.32109
Liver cirrhosis	Actinomyces	5.31623
Liver cirrhosis	Porphyromonas gingivalis	5.31623
Liver cirrhosis	Selenomonas	5.31623
Liver cirrhosis	Treponema	5.31623
Atopic dermatitis	Bacteroides uniformis	5.31446
Skin and mucosal infections	Clostridium difficile	5.29956
Ileal Crohn's disease(CD)	Staphylococcus epidermidis	5.27198
Ileal Crohn's disease(CD)	Dietzia maris	5.27198
Crohn's disease(CD)	Actinomyces	5.25894
Crohn's disease(CD)	Selenomonas	5.25894
Crohn's disease(CD)	Porphyromonas gingivalis	5.25894
Crohn's disease(CD)	Treponema	5.25894
Ileal Crohn's disease(CD)	Bacteroidales	5.24747
Ileal Crohn's disease(CD)	Erysipelotrichales	5.24747
Ileal Crohn's disease(CD)	Enterococcus faecium	5.24747
Ileal Crohn's disease(CD)	Porphyromonas	5.23955
Periodontal	Eubacteriaceae	5.21982
Ileal Crohn's disease(CD)	Eubacteriaceae	5.21982
COPD	Bacteroides vulgatus	5.21976
Skin and mucosal infections	Verrucomicrobiaceae	5.21294
Skin and mucosal infections	Ruminococcaceae	5.20692
Skin and mucosal infections	Rikenellaceae	5.20692
Clostridium difficile infection(CDI)	Bacteroides fragilis	5.20461
Atopic dermatitis	Clostridium leptum	5.20384
Asthma	Stenotrophomonas maltophilia	5.20104
Liver cirrhosis	Verrucomicrobiaceae	5.19934
Type 2 diabetes	Fusobacterium nucleatum	5.19585
Necrotizing Enterocolitis	Clostridiales	5.19338
Ileal Crohn's disease(CD)	Burkholderia	5.19208
Asthma	Clostridium difficile	5.19114
Atopy	Helicobacter pylori	5.18948
Asthma	Porphyromonas	5.17044
New-onset untreated rheumatoid arthrits	Bifidobacterium	5.16211
Colorectal carcinoma	Comamonadaceae	5.14123
Colorectal carcinoma	Oxalobacteraceae	5.14123
Colorectal carcinoma	Sphingomonadaceae	5.14123
Atopic dermatitis	Enterobacteriaceae	5.14073
Periodontal	Enterococcus	5.1397
Atopic sensitisation	Enterococcus	5.12775
Crohn's disease(CD)	Rikenellaceae	5.12408
Crohn's disease(CD)	Ruminococcaceae	5.12408
Inflammatory bowel disease(IBD)	Bacteroides uniformis	5.12039
Ileal Crohn's disease(CD)	Staphylococcus aureus	5.11885
Inflammatory bowel disease(IBD)	Stenotrophomonas maltophilia	5.09587
Bacterial Vaginosis	Xanthomonas	5.06155
Bacterial Vaginosis	Lysobacter	5.06155
Bacterial Vaginosis	Streptococcus mitis	5.06155
Bacterial Vaginosis	Rickettsiales	5.06155
Periodontal	Megasphaera	5.04585
Bacterial Vaginosis	Eubacteriaceae	5.03657
Kidney stones	Betaproteobacteria	5.03197
Cystic fibrosis	Verrucomicrobiaceae	5.02201
COPD	Clostridium difficile	5.02056
Asthma	Prevotellaceae	5.01139
Inflammatory bowel disease(IBD)	Clostridia	5.01119
Atopic dermatitis	Fusobacteriaceae	5.00894
Atopic dermatitis	Veillonellaceae	5.00894
Type 1 diabetes	Coxiellaceae	5.00335
Periodontal	Dietzia maris	4.99253
Periodontal	Staphylococcus epidermidis	4.99253
Liver cirrhosis	Lysobacter	4.98902
Liver cirrhosis	Streptococcus mitis	4.98902
Liver cirrhosis	Xanthomonas	4.98902
Liver cirrhosis	Rickettsiales	4.98902
Type 2 diabetes	Comamonadaceae	4.98693
Type 2 diabetes	Sphingomonadaceae	4.98693
Type 2 diabetes	Oxalobacteraceae	4.98693
Guttate psoriasis	Helicobacter pylori	4.98204
Allergic sensitization	Helicobacter pylori	4.98204
Recurrent wheeze	Helicobacter pylori	4.98204
New-onset untreated rheumatoid arthrits	Staphylococcus aureus	4.96721
Periodontal	Bacteroidaceae	4.95024
Allergic asthma	Enterococcus	4.94899
Type 2 diabetes	Bifidobacterium	4.94266
Necrotizing Enterocolitis	Bifidobacterium	4.94266
Gastro-oesophageal reflux	Clostridium difficile	4.92314
Skin and mucosal infections	Actinobacteria	4.90237
Cystic fibrosis	Porphyromonadaceae	4.89493
Skin and mucosal infections	Clostridia	4.88447
COPD	Stenotrophomonas maltophilia	4.87616
Skin and mucosal infections	Firmicutes	4.87429
Rheumatoid arthrits	Bacteroides uniformis	4.87008
Rheumatoid arthrits	Bacteroides ovatus	4.86595
Whipple's disease	Bacteroides uniformis	4.85323
COPD	Prevotellaceae	4.84073
Colorectal carcinoma	Verrucomicrobiaceae	4.82546
Systemic inflammatory response syndrome	Actinobacteria	4.82337
Bacterial Vaginosis	Staphylococcus epidermidis	4.81337
Bacterial Vaginosis	Dietzia maris	4.81337
Asthma	Bacteroides fragilis	4.80473
Ulcerative colitis	Bacteroides uniformis	4.7965
Atopic sensitisation	Bacteroides uniformis	4.7965
Gastric and duodenal ulcer	Bacteroides uniformis	4.7965
Systemic inflammatory response syndrome	Firmicutes	4.79528
Obesity	Bacteroidaceae	4.77249
COPD	Bacteroidaceae	4.77249
Irritable bowel syndrome(IBS)	Verrucomicrobiaceae	4.77205
Periodontal	Fusobacterium nucleatum	4.76426
Periodontal	Burkholderia	4.75229
Crohn's disease(CD)	Megasphaera	4.74425
Necrotizing Enterocolitis	Clostridium	4.73629
Periodontal	Bacteroides fragilis	4.73393
Obesity	Staphylococcus epidermidis	4.73281
Obesity	Dietzia maris	4.73281
Atopy	Stenotrophomonas maltophilia	4.7225
Atopy	Clostridium difficile	4.71701
Colon cancer	Helicobacter pylori	4.71091
Allergic asthma	Staphylococcus epidermidis	4.71009
Allergic asthma	Dietzia maris	4.71009
Obesity	Enterococcus faecium	4.70802
Obesity	Bacteroidales	4.70802
Obesity	Erysipelotrichales	4.70802
Bacterial Vaginosis	Verrucomicrobiaceae	4.68322
Colorectal carcinoma	Porphyromonas	4.68097
Systemic inflammatory response syndrome	Bacteroides uniformis	4.67988
Irritable bowel syndrome(IBS)	Klebsiella	4.66865
Obesity	Alistipes	4.66332
Obesity	Parabacteroides	4.66332
Gastric and duodenal ulcer	Enterococcus	4.65253
Psoriasis	Tannerella	4.63428
Allergic asthma	Tropheryma whipplei	4.61957
Crohn's disease(CD)	Porphyromonas	4.61516
Whipple's disease	Prevotella copri	4.61495
Colorectal carcinoma	Megasphaera	4.61352
Asthma	Tannerella	4.61343
Bacterial Vaginosis	Fusobacterium nucleatum	4.61253
Necrotizing Enterocolitis	Prevotellaceae	4.59125
Obesity	Stenotrophomonas maltophilia	4.58641
Liver cirrhosis	Alcaligenaceae	4.57791
Liver cirrhosis	Erysipelotrichaceae	4.57791
Liver cirrhosis	Methanobrevibacter smithii	4.57791
Liver cirrhosis	Coriobacteriaceae	4.57791
Irritable bowel syndrome(IBS)	Erysipelotrichaceae	4.57749
Irritable bowel syndrome(IBS)	Methanobrevibacter smithii	4.57749
Irritable bowel syndrome(IBS)	Alcaligenaceae	4.57749
Irritable bowel syndrome(IBS)	Coriobacteriaceae	4.57749
Whipple's disease	Porphyromonas gingivalis	4.57712
Whipple's disease	Actinomyces	4.57712
Whipple's disease	Selenomonas	4.57712
Whipple's disease	Streptococcus mitis	4.57712
Whipple's disease	Acinetobacter	4.57712
Whipple's disease	Xanthomonas	4.57712
Whipple's disease	Corynebacterium	4.57712
Whipple's disease	Lysobacter	4.57712
Whipple's disease	Oxalobacter formigenes	4.57712
Whipple's disease	Treponema	4.57712
Whipple's disease	Rickettsiales	4.57712
Whipple's disease	Coxiellaceae	4.57355
Inflammatory bowel disease(IBD)	Clostridiales	4.57281
Ulcerative colitis	Clostridiales	4.57281
Rheumatoid arthrits	Clostridiales	4.57281
Atopy	Clostridiales	4.57281
Systemic inflammatory response syndrome	Clostridiales	4.57281
Diarrhea Irritable bowel syndrome(IBS)	Clostridiales	4.57281
Ileal Crohn's disease(CD)	Bifidobacterium	4.56631
Obesity	Fusobacterium nucleatum	4.56559
Ileal Crohn's disease(CD)	Staphylococcus	4.56504
Clostridium difficile infection(CDI)	Sphingomonadaceae	4.55206
Clostridium difficile infection(CDI)	Comamonadaceae	4.55206
Clostridium difficile infection(CDI)	Oxalobacteraceae	4.55206
Atopic dermatitis	Enterococcus faecium	4.53125
Atopic dermatitis	Erysipelotrichales	4.53125
Atopic dermatitis	Bacteroidales	4.53125
Psoriasis	Bacteroides fragilis	4.52226
Colorectal carcinoma	Prevotellaceae	4.52192
Periodontal	Pseudomonas	4.52148
Diarrhea Irritable bowel syndrome(IBS)	Enterococcus	4.52035
Guttate psoriasis	Clostridium difficile	4.50957
Eczema	Helicobacter pylori	4.5076
Psoriasis	Verrucomicrobiaceae	4.48019
Allergic asthma	Stenotrophomonas maltophilia	4.46805
Crohn's disease(CD)	Prevotellaceae	4.46784
Psoriasis	Eubacteriaceae	4.45434
Cystic fibrosis	Eubacteriaceae	4.45434
COPD	Eubacteriaceae	4.45434
Colorectal carcinoma	Eubacteriaceae	4.45434
Colorectal carcinoma	Propionibacterium acnes	4.45274
Colorectal carcinoma	Propionibacterium	4.45274
Liver cirrhosis	Comamonadaceae	4.44042
Liver cirrhosis	Sphingomonadaceae	4.44042
Liver cirrhosis	Oxalobacteraceae	4.44042
Colorectal carcinoma	Ruminococcaceae	4.4182
Colorectal carcinoma	Rikenellaceae	4.4182
Clostridium difficile infection(CDI)	Porphyromonas	4.40622
Rheumatoid arthrits	Clostridia	4.4053
Clostridium difficile infection(CDI)	Klebsiella pneumoniae	4.40512
Bacterial Vaginosis	Klebsiella pneumoniae	4.40512
Bacterial Vaginosis	Enterobacter aerogenes	4.40512
Bacterial Vaginosis	Enterobacter hormaechei	4.40512
Clostridium difficile infection(CDI)	Shigella dysenteriae	4.40512
Clostridium difficile infection(CDI)	Enterobacter hormaechei	4.40512
Clostridium difficile infection(CDI)	Enterobacter aerogenes	4.40512
Bacterial Vaginosis	Shigella dysenteriae	4.40512
Clostridium difficile infection(CDI)	Megasphaera	4.38121
Obesity	Collinsella aerofaciens	4.38016
Asthma	Klebsiella	4.37258
Allergic sensitization	Bacteroides uniformis	4.35598
Eczema	Bacteroides uniformis	4.35598
Recurrent wheeze	Bacteroides uniformis	4.35598
Guttate psoriasis	Bacteroides uniformis	4.35598
Allergy	Bacteroides uniformis	4.35598
Gastro-oesophageal reflux	Bacteroides uniformis	4.35598
Eczema	Bacteroides ovatus	4.35185
Ulcerative colitis	Bacteroides ovatus	4.35185
Diarrhea Irritable bowel syndrome(IBS)	Bacteroides ovatus	4.35185
Inflammatory bowel disease(IBD)	Collinsella aerofaciens	4.34885
Ulcerative colitis	Clostridium difficile	4.33706
Obesity	Oxalobacteraceae	4.33363
Obesity	Sphingomonadaceae	4.33363
Obesity	Comamonadaceae	4.33363
Obesity	Verrucomicrobiaceae	4.33309
Psoriasis	Collinsella aerofaciens	4.33289
Ulcerative colitis	Clostridia	4.33172
Colorectal carcinoma	Bacteroides fragilis	4.31526
COPD	Tannerella	4.28855
Necrotizing Enterocolitis	Fusobacteriaceae	4.26905
Necrotizing Enterocolitis	Veillonellaceae	4.26905
Crohn's disease(CD)	Bacteroides fragilis	4.26118
Psoriasis	Bacteroidaceae	4.25188
Colon cancer	Stenotrophomonas maltophilia	4.24394
COPD	Megasphaera	4.2388
Colon cancer	Clostridium difficile	4.23845
Allergy	Enterococcus	4.22565
Colorectal carcinoma	Bacteroidaceae	4.22014
Atopic dermatitis	Collinsella aerofaciens	4.21546
Ulcerative colitis	Stenotrophomonas maltophilia	4.19738
Psoriasis	Stenotrophomonas maltophilia	4.18844
Asthma	Collinsella aerofaciens	4.17931
Psoriasis	Prevotellaceae	4.17664
Psoriasis	Megasphaera	4.17012
Bacterial Vaginosis	Bifidobacterium	4.15928
Inflammatory bowel disease(IBD)	Fusobacterium	4.15246
Atopy	Fusobacterium	4.15246
Ulcerative colitis	Burkholderia	4.14709
Irritable bowel syndrome(IBS)	Bacteroides fragilis	4.14627
Asthma	Coxiellaceae	4.14204
Clostridium difficile infection(CDI)	Shuttleworthia	4.13506
Asthma	Clostridium leptum	4.13319
Periodontal	Bifidobacterium	4.12653
Crohn's disease(CD)	Gammaproteobacteria	4.12621
Crohn's disease(CD)	Citrobacter	4.12621
Constipation Irritable bowel syndrome(IBS)	Eubacteriaceae	4.12593
Inflammatory bowel disease(IBD)	Eubacteriaceae	4.12593
Systemic inflammatory response syndrome	Eubacteriaceae	4.12593
Rheumatoid arthrits	Eubacteriaceae	4.12593
Ulcerative colitis	Eubacteriaceae	4.12593
Type 2 diabetes	Staphylococcus aureus	4.11492
Crohn's disease(CD)	Pseudomonas	4.10641
Obesity	Porphyromonas	4.0966
Atopic sensitisation	Stenotrophomonas maltophilia	4.09391
Type 2 diabetes	Ruminococcaceae	4.08604
Type 2 diabetes	Rikenellaceae	4.08604
Whipple's disease	Tannerella	4.07656
Crohn's disease(CD)	Tannerella	4.05929
Ileal Crohn's disease(CD)	Bacteroidaceae	4.05153
Bacterial Vaginosis	Clostridia	4.04929
Rheumatoid arthrits	Clostridium difficile	4.03727
Ileal Crohn's disease(CD)	Collinsella aerofaciens	4.03084
Irritable bowel syndrome(IBS)	Comamonadaceae	4.01313
Irritable bowel syndrome(IBS)	Oxalobacteraceae	4.01313
Irritable bowel syndrome(IBS)	Sphingomonadaceae	4.01313
Liver cirrhosis	Corynebacterium	4.00698
Liver cirrhosis	Tropheryma whipplei	4.00698
Liver cirrhosis	Prevotella copri	4.00698
Liver cirrhosis	Oxalobacter formigenes	4.00698
Liver cirrhosis	Acinetobacter	4.00698
Irritable bowel syndrome(IBS)	Tropheryma whipplei	4.00656
Irritable bowel syndrome(IBS)	Acinetobacter	4.00656
Irritable bowel syndrome(IBS)	Prevotella copri	4.00656
Irritable bowel syndrome(IBS)	Corynebacterium	4.00656
Irritable bowel syndrome(IBS)	Oxalobacter formigenes	4.00656
Obesity	Bacteroides fragilis	4.00554
Clostridium difficile infection(CDI)	Clostridium difficile	3.9952
Systemic inflammatory response syndrome	Bacteroidaceae	3.97186
Necrotizing Enterocolitis	Staphylococcus epidermidis	3.97064
Necrotizing Enterocolitis	Dietzia maris	3.97064
Clostridium difficile infection(CDI)	Streptococcus mitis	3.96661
Clostridium difficile infection(CDI)	Lysobacter	3.96661
Clostridium difficile infection(CDI)	Xanthomonas	3.96661
Clostridium difficile infection(CDI)	Rickettsiales	3.96661
Obesity	Clostridia	3.96601
Bacterial Vaginosis	Porphyromonas	3.95897
Skin and mucosal infections	Fusobacterium	3.95514
COPD	Bacteroides	3.94975
Asthma	Bacteroides	3.94622
Ileal Crohn's disease(CD)	Porphyromonas gingivalis	3.93359
Ileal Crohn's disease(CD)	Treponema	3.93359
Ileal Crohn's disease(CD)	Selenomonas	3.93359
Ileal Crohn's disease(CD)	Actinomyces	3.93359
Crohn's disease(CD)	Xanthomonas	3.92996
Crohn's disease(CD)	Lysobacter	3.92996
Crohn's disease(CD)	Streptococcus mitis	3.92996
Crohn's disease(CD)	Rickettsiales	3.92996
Necrotizing Enterocolitis	Stenotrophomonas maltophilia	3.92262
Clostridium difficile infection(CDI)	Clostridia	3.91419
Colorectal carcinoma	Actinomyces	3.9018
Colorectal carcinoma	Treponema	3.9018
Colorectal carcinoma	Porphyromonas gingivalis	3.9018
Colorectal carcinoma	Selenomonas	3.9018
Atopic dermatitis	Klebsiella	3.90034
Rheumatoid arthrits	Stenotrophomonas maltophilia	3.8976
Atopic dermatitis	Eubacteriaceae	3.8914
Inflammatory bowel disease(IBD)	Prevotellaceae	3.88272
Atopy	Prevotellaceae	3.88272
COPD	Ruminococcaceae	3.86546
COPD	Rikenellaceae	3.86546
Obesity	Propionibacterium	3.86365
Obesity	Propionibacterium acnes	3.86365
Rheumatoid arthrits	Burkholderia	3.84731
Cystic fibrosis	Fusobacteria	3.82934
Crohn's disease(CD)	Desulfovibrio	3.82273
Psoriasis	Coriobacteriaceae	3.80359
Psoriasis	Methanobrevibacter smithii	3.80359
Psoriasis	Erysipelotrichaceae	3.80359
Psoriasis	Alcaligenaceae	3.80359
Skin and mucosal infections	Haemophilus	3.79154
Gastro-oesophageal reflux	Enterococcus	3.78875
Type 2 diabetes	Prevotellaceae	3.74925
Obesity	Clostridium difficile	3.71667
Ileal Crohn's disease(CD)	Stenotrophomonas maltophilia	3.71076
Psoriasis	Clostridium difficile	3.70948
Asthma	Verrucomicrobiaceae	3.68484
Bacterial Vaginosis	Collinsella aerofaciens	3.66352
Inflammatory bowel disease(IBD)	Clostridium difficile	3.66169
Clostridium difficile infection(CDI)	Gammaproteobacteria	3.65255
Bacterial Vaginosis	Gammaproteobacteria	3.65255
Rheumatoid arthrits	Staphylococcus	3.64248
Gastric and duodenal ulcer	Stenotrophomonas maltophilia	3.61869
Necrotizing Enterocolitis	Rikenellaceae	3.61599
Necrotizing Enterocolitis	Ruminococcaceae	3.61599
Skin and mucosal infections	Staphylococcus	3.61511
Allergy	Stenotrophomonas maltophilia	3.61135
Atopic dermatitis	Tannerella	3.60255
Crohn's disease(CD)	Coxiellaceae	3.59963
Colorectal carcinoma	Tannerella	3.59751
Psoriasis	Desulfovibrio	3.59123
Periodontal	Collinsella aerofaciens	3.59105
Periodontal	Rickettsiales	3.58821
Periodontal	Xanthomonas	3.58821
Periodontal	Streptococcus mitis	3.58821
Periodontal	Lysobacter	3.58821
Allergic asthma	Collinsella aerofaciens	3.57928
Whipple's disease	Prevotellaceae	3.57265
Recurrent wheeze	Eubacteriaceae	3.56299
Allergy	Eubacteriaceae	3.56299
Whipple's disease	Eubacteriaceae	3.56299
New-onset untreated rheumatoid arthrits	Eubacteriaceae	3.56299
Skin and mucosal infections	Eubacteriaceae	3.56299
Eczema	Eubacteriaceae	3.56299
Allergic asthma	Eubacteriaceae	3.56299
Gastric and duodenal ulcer	Eubacteriaceae	3.56299
Gastro-oesophageal reflux	Eubacteriaceae	3.56299
Guttate psoriasis	Eubacteriaceae	3.56299
Colon cancer	Eubacteriaceae	3.56299
Kidney stones	Eubacteriaceae	3.56299
Allergic sensitization	Eubacteriaceae	3.56299
Atopic sensitisation	Eubacteriaceae	3.56299
Diarrhea Irritable bowel syndrome(IBS)	Eubacteriaceae	3.56299
Ileal Crohn's disease(CD)	Fusobacterium nucleatum	3.55869
Skin and mucosal infections	Klebsiella pneumoniae	3.55036
Skin and mucosal infections	Enterobacter aerogenes	3.55036
Skin and mucosal infections	Enterobacter hormaechei	3.55036
Skin and mucosal infections	Shigella dysenteriae	3.55036
Cystic fibrosis	Gammaproteobacteria	3.55036
Cystic fibrosis	Enterobacter hormaechei	3.55036
Cystic fibrosis	Enterobacter aerogenes	3.55036
Cystic fibrosis	Citrobacter	3.55036
Cystic fibrosis	Klebsiella pneumoniae	3.55036
Cystic fibrosis	Shigella dysenteriae	3.55036
COPD	Verrucomicrobiaceae	3.53055
Systemic inflammatory response syndrome	Staphylococcus	3.52363
Inflammatory bowel disease(IBD)	Staphylococcus	3.52363
Rheumatoid arthrits	Dietzia maris	3.51104
Rheumatoid arthrits	Staphylococcus epidermidis	3.51104
Atopic dermatitis	Actinobacteria	3.48255
New-onset untreated rheumatoid arthrits	Bacteroides ovatus	3.47737
Colorectal carcinoma	Erysipelotrichales	3.47431
Colorectal carcinoma	Bacteroidales	3.47431
Colorectal carcinoma	Enterococcus faecium	3.47431
Asthma	Clostridia	3.46446
Ulcerative colitis	Collinsella aerofaciens	3.45036
Necrotizing Enterocolitis	Porphyromonas	3.43824
New-onset untreated rheumatoid arthrits	Clostridiales	3.43385
Allergic asthma	Clostridiales	3.42764
Atopic sensitisation	Clostridiales	3.42764
Colon cancer	Clostridiales	3.42764
Infectious colitis	Clostridiales	3.42764
Recurrent wheeze	Clostridiales	3.42764
Gastric and duodenal ulcer	Clostridiales	3.42764
Whipple's disease	Clostridiales	3.42764
Allergic sensitization	Clostridiales	3.42764
Gastro-oesophageal reflux	Clostridiales	3.42764
Constipation Irritable bowel syndrome(IBS)	Clostridiales	3.42764
Eczema	Clostridiales	3.42764
Allergy	Clostridiales	3.42764
Guttate psoriasis	Clostridiales	3.42764
Bacterial Vaginosis	Porphyromonas gingivalis	3.41712
Bacterial Vaginosis	Treponema	3.41712
Bacterial Vaginosis	Actinomyces	3.41712
Bacterial Vaginosis	Selenomonas	3.41712
Allergy	Staphylococcus epidermidis	3.41649
Allergy	Dietzia maris	3.41649
Necrotizing Enterocolitis	Collinsella aerofaciens	3.41058
Atopic dermatitis	Porphyromonadaceae	3.4069
Kidney stones	Clostridiales	3.39886
Crohn's disease(CD)	Prevotella copri	3.38488
Crohn's disease(CD)	Tropheryma whipplei	3.38488
Crohn's disease(CD)	Acinetobacter	3.38488
Crohn's disease(CD)	Corynebacterium	3.38488
Crohn's disease(CD)	Oxalobacter formigenes	3.38488
New-onset untreated rheumatoid arthrits	Enterococcus	3.38472
Colon cancer	Dietzia maris	3.38101
Colon cancer	Staphylococcus epidermidis	3.38101
Colon cancer	Enterococcus	3.37518
Constipation Irritable bowel syndrome(IBS)	Enterococcus	3.37518
Infectious colitis	Enterococcus	3.37518
Guttate psoriasis	Enterococcus	3.37518
Allergic sensitization	Enterococcus	3.37518
Eczema	Enterococcus	3.37518
Recurrent wheeze	Enterococcus	3.37518
Necrotizing Enterocolitis	Coxiellaceae	3.37331
Asthma	Desulfovibrio	3.35487
Liver cirrhosis	Propionibacterium	3.35384
Liver cirrhosis	Propionibacterium acnes	3.35384
Colon cancer	Burkholderia	3.33807
Kidney stones	Enterococcus	3.3369
Systemic inflammatory response syndrome	Burkholderia	3.33321
Atopy	Clostridium leptum	3.33183
Allergy	Tropheryma whipplei	3.32597
COPD	Bacteroides fragilis	3.32201
Crohn's disease(CD)	Alcaligenaceae	3.31144
Crohn's disease(CD)	Coriobacteriaceae	3.31144
Crohn's disease(CD)	Erysipelotrichaceae	3.31144
Crohn's disease(CD)	Methanobrevibacter smithii	3.31144
Colon cancer	Tropheryma whipplei	3.2905
Bacterial Vaginosis	Tannerella	3.28969
Atopic dermatitis	Lysobacter	3.28939
Atopic dermatitis	Rickettsiales	3.28939
Atopic dermatitis	Streptococcus mitis	3.28939
Atopic dermatitis	Xanthomonas	3.28939
Systemic inflammatory response syndrome	Helicobacter pylori	3.27737
Periodontal	Stenotrophomonas maltophilia	3.27098
Asthma	Dietzia maris	3.27017
Asthma	Staphylococcus epidermidis	3.27017
Liver cirrhosis	Shuttleworthia	3.2612
Atopic sensitisation	Prevotellaceae	3.25413
Clostridium difficile infection(CDI)	Selenomonas	3.24265
Clostridium difficile infection(CDI)	Treponema	3.24265
Clostridium difficile infection(CDI)	Actinomyces	3.24265
Clostridium difficile infection(CDI)	Porphyromonas gingivalis	3.24265
Atopic dermatitis	Bacteroides vulgatus	3.23825
Atopy	Bacteroides uniformis	3.22265
Atopic dermatitis	Treponema	3.21027
Atopic dermatitis	Porphyromonas gingivalis	3.21027
Atopic dermatitis	Selenomonas	3.21027
Atopic dermatitis	Actinomyces	3.21027
Atopic dermatitis	Comamonadaceae	3.20855
Atopic dermatitis	Oxalobacteraceae	3.20855
Atopic dermatitis	Sphingomonadaceae	3.20855
Atopic dermatitis	Pseudomonas	3.20855
Atopic sensitisation	Collinsella aerofaciens	3.20514
Colorectal carcinoma	Clostridium leptum	3.2032
Inflammatory bowel disease(IBD)	Coxiellaceae	3.19812
Atopic sensitisation	Burkholderia	3.18804
Atopy	Burkholderia	3.18804
Asthma	Porphyromonadaceae	3.16856
COPD	Porphyromonadaceae	3.16856
Type 2 diabetes	Verrucomicrobiaceae	3.16489
Psoriasis	Lysobacter	3.15338
Psoriasis	Streptococcus mitis	3.15338
Psoriasis	Prevotella copri	3.15338
Psoriasis	Corynebacterium	3.15338
Psoriasis	Xanthomonas	3.15338
Psoriasis	Acinetobacter	3.15338
Psoriasis	Tropheryma whipplei	3.15338
Psoriasis	Rickettsiales	3.15338
Ileal Crohn's disease(CD)	Desulfovibrio	3.14872
Allergic asthma	Burkholderia	3.14861
Atopic dermatitis	Bacteroides	3.14556
Crohn's disease(CD)	Clostridium difficile	3.13091
Ileal Crohn's disease(CD)	Coxiellaceae	3.10527
Colorectal carcinoma	Coriobacteriaceae	3.0998
Colorectal carcinoma	Alcaligenaceae	3.0998
Colorectal carcinoma	Erysipelotrichaceae	3.0998
Colorectal carcinoma	Methanobrevibacter smithii	3.0998
Asthma	Megasphaera	3.08104
Allergic asthma	Prevotellaceae	3.07536
Rheumatoid arthrits	Prevotellaceae	3.05781
Atopic dermatitis	Bacteroidaceae	3.05249
Colorectal carcinoma	Stenotrophomonas maltophilia	3.05108
Necrotizing Enterocolitis	Clostridia	3.04432
Periodontal	Staphylococcus aureus	3.02657
Inflammatory bowel disease(IBD)	Bacteroidaceae	3.02476
Psoriasis	Shuttleworthia	3.01219
Type 2 diabetes	Tannerella	3.0027
Gastric and duodenal ulcer	Staphylococcus epidermidis	2.99694
Atopic sensitisation	Dietzia maris	2.99694
Allergic sensitization	Staphylococcus epidermidis	2.99694
Gastro-oesophageal reflux	Dietzia maris	2.99694
Eczema	Staphylococcus epidermidis	2.99694
Infectious colitis	Staphylococcus epidermidis	2.99694
Diarrhea Irritable bowel syndrome(IBS)	Dietzia maris	2.99694
Gastro-oesophageal reflux	Staphylococcus epidermidis	2.99694
Systemic inflammatory response syndrome	Staphylococcus epidermidis	2.99694
Constipation Irritable bowel syndrome(IBS)	Staphylococcus epidermidis	2.99694
Systemic inflammatory response syndrome	Dietzia maris	2.99694
Guttate psoriasis	Staphylococcus epidermidis	2.99694
Ulcerative colitis	Dietzia maris	2.99694
Recurrent wheeze	Dietzia maris	2.99694
Constipation Irritable bowel syndrome(IBS)	Dietzia maris	2.99694
Atopy	Dietzia maris	2.99694
Gastric and duodenal ulcer	Dietzia maris	2.99694
Allergic sensitization	Dietzia maris	2.99694
Atopic sensitisation	Staphylococcus epidermidis	2.99694
Infectious colitis	Dietzia maris	2.99694
Inflammatory bowel disease(IBD)	Dietzia maris	2.99694
Diarrhea Irritable bowel syndrome(IBS)	Staphylococcus epidermidis	2.99694
Guttate psoriasis	Dietzia maris	2.99694
Atopy	Staphylococcus epidermidis	2.99694
Ulcerative colitis	Staphylococcus epidermidis	2.99694
Recurrent wheeze	Staphylococcus epidermidis	2.99694
Eczema	Dietzia maris	2.99694
Inflammatory bowel disease(IBD)	Staphylococcus epidermidis	2.99694
Clostridium difficile infection(CDI)	Oxalobacter formigenes	2.98457
Clostridium difficile infection(CDI)	Tropheryma whipplei	2.98457
Clostridium difficile infection(CDI)	Corynebacterium	2.98457
Clostridium difficile infection(CDI)	Prevotella copri	2.98457
Clostridium difficile infection(CDI)	Acinetobacter	2.98457
Clostridium difficile infection(CDI)	Desulfovibrio	2.98457
Ulcerative colitis	Prevotellaceae	2.98423
Obesity	Coxiellaceae	2.98234
Periodontal	Gammaproteobacteria	2.98104
Asthma	Gammaproteobacteria	2.98104
Ileal Crohn's disease(CD)	Gammaproteobacteria	2.98104
Asthma	Citrobacter	2.98104
Ileal Crohn's disease(CD)	Citrobacter	2.98104
Periodontal	Citrobacter	2.98104
Psoriasis	Klebsiella pneumoniae	2.97279
Periodontal	Klebsiella pneumoniae	2.97279
Periodontal	Enterobacter hormaechei	2.97279
Psoriasis	Enterobacter hormaechei	2.97279
Crohn's disease(CD)	Klebsiella pneumoniae	2.97279
Psoriasis	Shigella dysenteriae	2.97279
Crohn's disease(CD)	Shigella dysenteriae	2.97279
Periodontal	Shigella dysenteriae	2.97279
Periodontal	Enterobacter aerogenes	2.97279
Crohn's disease(CD)	Enterobacter aerogenes	2.97279
Psoriasis	Enterobacter aerogenes	2.97279
Crohn's disease(CD)	Enterobacter hormaechei	2.97279
Clostridium difficile infection(CDI)	Gardnerella vaginalis	2.96691
Clostridium difficile infection(CDI)	Atopobium	2.96691
Clostridium difficile infection(CDI)	Candidate division TM7	2.96691
Clostridium difficile infection(CDI)	Papillibacter	2.96691
Clostridium difficile infection(CDI)	Atopobium vaginae	2.96691
Clostridium difficile infection(CDI)	Leptotrichia amnionii	2.96691
Clostridium difficile infection(CDI)	Mobiluncus	2.96691
Clostridium difficile infection(CDI)	Porphyromonas uenonis	2.96691
Clostridium difficile infection(CDI)	Streptobacillus	2.96691
Clostridium difficile infection(CDI)	Gardnerella	2.96691
Clostridium difficile infection(CDI)	Aerococcus	2.96691
Clostridium difficile infection(CDI)	Olsenella	2.96691
Clostridium difficile infection(CDI)	Lactobacillus iners	2.96691
Clostridium difficile infection(CDI)	Lactobacillus crispatus	2.96691
Clostridium difficile infection(CDI)	Eggerthella	2.96691
Clostridium difficile infection(CDI)	Leptotrichia	2.96691
Type 2 diabetes	Bacteroides vulgatus	2.96675
Type 2 diabetes	Megasphaera	2.95294
New-onset untreated rheumatoid arthrits	Dietzia maris	2.94855
New-onset untreated rheumatoid arthrits	Staphylococcus epidermidis	2.94855
Necrotizing Enterocolitis	Desulfovibrio	2.9475
Psoriasis	Coxiellaceae	2.93507
Necrotizing Enterocolitis	Fusobacterium nucleatum	2.92793
Irritable bowel syndrome(IBS)	Propionibacterium acnes	2.92654
Irritable bowel syndrome(IBS)	Propionibacterium	2.92654
Crohn's disease(CD)	Clostridia	2.92159
Colorectal carcinoma	Dietzia maris	2.92158
Colorectal carcinoma	Staphylococcus epidermidis	2.92158
Gastric and duodenal ulcer	Tropheryma whipplei	2.90642
Guttate psoriasis	Tropheryma whipplei	2.90642
Atopic sensitisation	Tropheryma whipplei	2.90642
Recurrent wheeze	Tropheryma whipplei	2.90642
Gastro-oesophageal reflux	Tropheryma whipplei	2.90642
Allergic sensitization	Tropheryma whipplei	2.90642
Constipation Irritable bowel syndrome(IBS)	Tropheryma whipplei	2.90642
Atopy	Tropheryma whipplei	2.90642
Infectious colitis	Tropheryma whipplei	2.90642
Atopy	Collinsella aerofaciens	2.88487
Kidney stones	Tropheryma whipplei	2.87514
New-onset untreated rheumatoid arthrits	Tropheryma whipplei	2.85804
Atopy	Coxiellaceae	2.82476
Psoriasis	Alistipes	2.82349
Psoriasis	Parabacteroides	2.82349
Infectious colitis	Helicobacter pylori	2.80831
Constipation Irritable bowel syndrome(IBS)	Helicobacter pylori	2.80831
Colorectal carcinoma	Shuttleworthia	2.8052
Ileal Crohn's disease(CD)	Pseudomonas	2.80181
Type 2 diabetes	Propionibacterium acnes	2.79216
Type 2 diabetes	Propionibacterium	2.79216
Clostridium difficile infection(CDI)	Erysipelotrichaceae	2.79181
Clostridium difficile infection(CDI)	Alcaligenaceae	2.79181
Clostridium difficile infection(CDI)	Coriobacteriaceae	2.79181
Clostridium difficile infection(CDI)	Methanobrevibacter smithii	2.79181
Bacterial Vaginosis	Comamonadaceae	2.79025
Bacterial Vaginosis	Sphingomonadaceae	2.79025
Bacterial Vaginosis	Oxalobacteraceae	2.79025
Atopic dermatitis	Prevotella copri	2.78433
Diarrhea Irritable bowel syndrome(IBS)	Bacteroides uniformis	2.78213
Constipation Irritable bowel syndrome(IBS)	Bacteroides uniformis	2.78213
Infectious colitis	Bacteroides uniformis	2.78213
Colon cancer	Bacteroides uniformis	2.78213
Gastric and duodenal ulcer	Prevotellaceae	2.7789
Kidney stones	Helicobacter pylori	2.77256
Type 2 diabetes	Dietzia maris	2.76728
Type 2 diabetes	Staphylococcus epidermidis	2.76728
COPD	Alistipes	2.76725
COPD	Parabacteroides	2.76725
Type 2 diabetes	Parabacteroides	2.76372
Ileal Crohn's disease(CD)	Alistipes	2.76372
Asthma	Alistipes	2.76372
Type 2 diabetes	Alistipes	2.76372
Asthma	Parabacteroides	2.76372
Ileal Crohn's disease(CD)	Parabacteroides	2.76372
Clostridium difficile infection(CDI)	Eubacterium	2.76148
Bacterial Vaginosis	Eubacterium	2.76148
Ileal Crohn's disease(CD)	Rickettsiales	2.75981
Ileal Crohn's disease(CD)	Streptococcus mitis	2.75981
Ileal Crohn's disease(CD)	Lysobacter	2.75981
Ileal Crohn's disease(CD)	Xanthomonas	2.75981
Gastro-oesophageal reflux	Stenotrophomonas maltophilia	2.7549
Clostridium difficile infection(CDI)	Prevotellaceae	2.74932
Atopic dermatitis	Corynebacterium	2.74431
Atopic dermatitis	Oxalobacter formigenes	2.74431
Atopic dermatitis	Acinetobacter	2.74431
Kidney stones	Bacteroides uniformis	2.74167
Bacterial Vaginosis	Coxiellaceae	2.73796
Gastric and duodenal ulcer	Collinsella aerofaciens	2.72992
Inflammatory bowel disease(IBD)	Klebsiella	2.72476
Allergy	Collinsella aerofaciens	2.72259
Atopic dermatitis	Haemophilus	2.71542
Asthma	Methanobrevibacter smithii	2.70136
Asthma	Coriobacteriaceae	2.70136
Asthma	Erysipelotrichaceae	2.70136
Asthma	Alcaligenaceae	2.70136
Systemic inflammatory response syndrome	Clostridia	2.69664
Ileal Crohn's disease(CD)	Clostridium difficile	2.6814
Crohn's disease(CD)	Propionibacterium	2.67193
Crohn's disease(CD)	Propionibacterium acnes	2.67193
Periodontal	Propionibacterium acnes	2.66769
Periodontal	Propionibacterium	2.66769
Periodontal	Coxiellaceae	2.66548
Atopic dermatitis	Tropheryma whipplei	2.6542
COPD	Clostridium leptum	2.65047
Clostridium difficile infection(CDI)	Staphylococcus aureus	2.63716
Ileal Crohn's disease(CD)	Prevotellaceae	2.63346
Necrotizing Enterocolitis	Megasphaera	2.62143
Inflammatory bowel disease(IBD)	Haemophilus	2.61202
Periodontal	Verrucomicrobiaceae	2.61021
Periodontal	Coriobacteriaceae	2.60177
Periodontal	Alcaligenaceae	2.60177
Periodontal	Methanobrevibacter smithii	2.60177
Periodontal	Erysipelotrichaceae	2.60177
Inflammatory bowel disease(IBD)	Tannerella	2.59201
Colorectal carcinoma	Clostridium difficile	2.57211
Allergic asthma	Coxiellaceae	2.5703
Type 2 diabetes	Collinsella aerofaciens	2.56858
Type 2 diabetes	Gammaproteobacteria	2.56383
Type 2 diabetes	Citrobacter	2.56383
Atopic dermatitis	Lactobacillus	2.56184
Atopy	Bacteroides fragilis	2.55932
Inflammatory bowel disease(IBD)	Bacteroides vulgatus	2.55932
Atopy	Porphyromonas	2.55932
COPD	Methanobrevibacter smithii	2.54707
COPD	Erysipelotrichaceae	2.54707
COPD	Alcaligenaceae	2.54707
COPD	Coriobacteriaceae	2.54707
Crohn's disease(CD)	Comamonadaceae	2.537
Crohn's disease(CD)	Sphingomonadaceae	2.537
Crohn's disease(CD)	Oxalobacteraceae	2.537
Type 2 diabetes	Coxiellaceae	2.53131
COPD	Collinsella aerofaciens	2.52601
Inflammatory bowel disease(IBD)	Enterobacteriaceae	2.52224
Bacterial Vaginosis	Clostridium difficile	2.51962
Periodontal	Oxalobacteraceae	2.5151
Periodontal	Sphingomonadaceae	2.5151
Periodontal	Comamonadaceae	2.5151
Type 2 diabetes	Porphyromonas	2.50021
Bacterial Vaginosis	Acinetobacter	2.49728
Bacterial Vaginosis	Oxalobacter formigenes	2.49728
Bacterial Vaginosis	Tropheryma whipplei	2.49728
Bacterial Vaginosis	Prevotella copri	2.49728
Bacterial Vaginosis	Desulfovibrio	2.49728
Bacterial Vaginosis	Corynebacterium	2.49728
COPD	Coxiellaceae	2.48874
Whipple's disease	Sphingomonadaceae	2.4872
Whipple's disease	Comamonadaceae	2.4872
Whipple's disease	Pseudomonas	2.4872
Whipple's disease	Oxalobacteraceae	2.4872
Atopic dermatitis	Bacilli	2.47979
Inflammatory bowel disease(IBD)	Porphyromonadaceae	2.46232
Necrotizing Enterocolitis	Eubacterium	2.45847
Type 2 diabetes	Stenotrophomonas maltophilia	2.45626
Rheumatoid arthrits	Comamonadaceae	2.45031
Rheumatoid arthrits	Sphingomonadaceae	2.45031
Rheumatoid arthrits	Oxalobacteraceae	2.45031
Rheumatoid arthrits	Pseudomonas	2.45031
Asthma	Corynebacterium	2.42339
Asthma	Rickettsiales	2.42339
Asthma	Oxalobacter formigenes	2.42339
Asthma	Acinetobacter	2.42339
Asthma	Streptococcus mitis	2.42339
Asthma	Lysobacter	2.42339
Asthma	Xanthomonas	2.42339
Asthma	Tropheryma whipplei	2.42339
Asthma	Prevotella copri	2.4212
Obesity	Rickettsiales	2.41672
Obesity	Lysobacter	2.41672
Obesity	Xanthomonas	2.41672
Obesity	Streptococcus mitis	2.41672
Clostridium difficile infection(CDI)	Stenotrophomonas maltophilia	2.40718
Asthma	Shuttleworthia	2.40676
Infectious colitis	Fusobacterium	2.39988
Systemic inflammatory response syndrome	Fusobacterium	2.39988
Type 2 diabetes	Bacteroides fragilis	2.39742
Whipple's disease	Haemophilus	2.3944
Liver cirrhosis	Staphylococcus	2.39367
Colon cancer	Tannerella	2.36868
Psoriasis	Mobiluncus	2.36782
Psoriasis	Streptobacillus	2.36782
Psoriasis	Aerococcus	2.36782
Psoriasis	Porphyromonas uenonis	2.36782
Psoriasis	Eggerthella	2.36782
Psoriasis	Papillibacter	2.36782
Psoriasis	Gardnerella vaginalis	2.36782
Psoriasis	Gardnerella	2.36782
Psoriasis	Lactobacillus iners	2.36782
Psoriasis	Lactobacillus crispatus	2.36782
Psoriasis	Leptotrichia	2.36782
Psoriasis	Atopobium vaginae	2.36782
Psoriasis	Candidate division TM7	2.36782
Psoriasis	Olsenella	2.36782
Psoriasis	Leptotrichia amnionii	2.36782
Psoriasis	Atopobium	2.36782
Whipple's disease	Clostridia	2.35741
Allergy	Prevotellaceae	2.35202
Colon cancer	Coxiellaceae	2.34619
Whipple's disease	Coriobacteriaceae	2.34586
Whipple's disease	Methanobrevibacter smithii	2.34586
Whipple's disease	Erysipelotrichaceae	2.34586
Whipple's disease	Alcaligenaceae	2.34586
Infectious colitis	Stenotrophomonas maltophilia	2.34133
Allergic sensitization	Stenotrophomonas maltophilia	2.34133
Recurrent wheeze	Stenotrophomonas maltophilia	2.34133
Guttate psoriasis	Stenotrophomonas maltophilia	2.34133
Constipation Irritable bowel syndrome(IBS)	Stenotrophomonas maltophilia	2.34133
Systemic inflammatory response syndrome	Stenotrophomonas maltophilia	2.34133
Whipple's disease	Fusobacterium nucleatum	2.34002
Type 2 diabetes	Treponema	2.33942
Type 2 diabetes	Actinomyces	2.33942
Type 2 diabetes	Porphyromonas gingivalis	2.33942
Type 2 diabetes	Selenomonas	2.33942
Constipation Irritable bowel syndrome(IBS)	Clostridium difficile	2.33584
Infectious colitis	Clostridium difficile	2.33584
Diarrhea Irritable bowel syndrome(IBS)	Helicobacter pylori	2.33387
COPD	Porphyromonas gingivalis	2.31321
COPD	Selenomonas	2.31321
COPD	Treponema	2.31321
COPD	Actinomyces	2.31321
Obesity	Shuttleworthia	2.31223
Ileal Crohn's disease(CD)	Clostridia	2.31171
Obesity	Desulfovibrio	2.30949
Kidney stones	Stenotrophomonas maltophilia	2.30624
Allergic asthma	Actinobacteria	2.3041
Gastric and duodenal ulcer	Actinobacteria	2.3041
Gastro-oesophageal reflux	Actinobacteria	2.3041
Allergy	Actinobacteria	2.3041
Kidney stones	Clostridium difficile	2.3001
Ulcerative colitis	Coxiellaceae	2.29963
Gastric and duodenal ulcer	Burkholderia	2.29925
Atopy	Klebsiella	2.29474
Whipple's disease	Bacteroides vulgatus	2.29216
Whipple's disease	Bacteroides fragilis	2.29216
Whipple's disease	Porphyromonas	2.29216
Allergy	Burkholderia	2.29192
Atopic dermatitis	Burkholderia	2.28886
COPD	Porphyromonas	2.27963
Necrotizing Enterocolitis	Pseudomonas	2.27183
Rheumatoid arthrits	Propionibacterium	2.26669
Rheumatoid arthrits	Propionibacterium acnes	2.26669
Whipple's disease	Fusobacterium	2.26306
Necrotizing Enterocolitis	Clostridium difficile	2.26022
Atopic sensitisation	Fusobacterium	2.25471
COPD	Shuttleworthia	2.25246
Colon cancer	Haemophilus	2.24352
Systemic inflammatory response syndrome	Haemophilus	2.23866
Rheumatoid arthrits	Lactobacillus	2.22713
Rheumatoid arthrits	Faecalibacterium prausnitzii	2.22713
Rheumatoid arthrits	Clostridium	2.22713
Atopic sensitisation	Tannerella	2.21865
Atopy	Tannerella	2.21865
Rheumatoid arthrits	Verrucomicrobiaceae	2.21416
Ileal Crohn's disease(CD)	Tropheryma whipplei	2.19985
Allergic asthma	Prevotella copri	2.19814
Atopic sensitisation	Coxiellaceae	2.19616
Ileal Crohn's disease(CD)	Megasphaera	2.19439
Colon cancer	Clostridium leptum	2.18666
Gastric and duodenal ulcer	Clostridium leptum	2.18666
Guttate psoriasis	Clostridium leptum	2.18666
Constipation Irritable bowel syndrome(IBS)	Clostridium leptum	2.18666
Atopic sensitisation	Clostridium leptum	2.18666
Allergy	Clostridium leptum	2.18666
Infectious colitis	Clostridium leptum	2.18666
Recurrent wheeze	Clostridium leptum	2.18666
Allergic sensitization	Clostridium leptum	2.18666
Allergic asthma	Clostridium leptum	2.18666
Whipple's disease	Clostridium leptum	2.18666
Gastro-oesophageal reflux	Clostridium leptum	2.18666
Infectious colitis	Clostridia	2.18405
Allergic asthma	Tannerella	2.17922
Asthma	Propionibacterium acnes	2.17807
Asthma	Propionibacterium	2.17807
Irritable bowel syndrome(IBS)	Shuttleworthia	2.16804
Bacterial Vaginosis	Prevotellaceae	2.16563
Clostridium difficile infection(CDI)	Collinsella aerofaciens	2.16253
Colorectal carcinoma	Gardnerella vaginalis	2.16082
Colorectal carcinoma	Papillibacter	2.16082
Colorectal carcinoma	Gardnerella	2.16082
Colorectal carcinoma	Eggerthella	2.16082
Colorectal carcinoma	Atopobium	2.16082
Colorectal carcinoma	Atopobium vaginae	2.16082
Colorectal carcinoma	Streptobacillus	2.16082
Colorectal carcinoma	Olsenella	2.16082
Colorectal carcinoma	Leptotrichia amnionii	2.16082
Colorectal carcinoma	Candidate division TM7	2.16082
Colorectal carcinoma	Leptotrichia	2.16082
Colorectal carcinoma	Lactobacillus iners	2.16082
Colorectal carcinoma	Porphyromonas uenonis	2.16082
Colorectal carcinoma	Lactobacillus crispatus	2.16082
Colorectal carcinoma	Mobiluncus	2.16082
Colorectal carcinoma	Aerococcus	2.16082
Allergic asthma	Streptococcus mitis	2.16031
Allergic asthma	Treponema	2.16031
Allergic asthma	Xanthomonas	2.16031
Allergic asthma	Actinomyces	2.16031
Allergic asthma	Corynebacterium	2.16031
Allergic asthma	Lysobacter	2.16031
Allergic asthma	Acinetobacter	2.16031
Allergic asthma	Porphyromonas gingivalis	2.16031
Allergic asthma	Rickettsiales	2.16031
Allergic asthma	Oxalobacter formigenes	2.16031
Allergic asthma	Selenomonas	2.16031
Kidney stones	Clostridium leptum	2.15736
Atopic dermatitis	Methanobrevibacter smithii	2.14299
Atopic dermatitis	Erysipelotrichaceae	2.14299
Atopic dermatitis	Alcaligenaceae	2.14299
Atopic dermatitis	Coriobacteriaceae	2.14299
Eczema	Klebsiella	2.13272
Periodontal	Prevotella copri	2.13136
Periodontal	Acinetobacter	2.13136
Periodontal	Desulfovibrio	2.13136
Periodontal	Corynebacterium	2.13136
Periodontal	Tropheryma whipplei	2.13136
Periodontal	Oxalobacter formigenes	2.13136
Infectious colitis	Porphyromonas	2.11881
Systemic inflammatory response syndrome	Bacteroides vulgatus	2.11881
Infectious colitis	Bacteroides fragilis	2.11881
Bacterial Vaginosis	Propionibacterium	2.11502
Bacterial Vaginosis	Propionibacterium acnes	2.11502
Constipation Irritable bowel syndrome(IBS)	Fusobacterium	2.10408
Necrotizing Enterocolitis	Actinomyces	2.10394
Necrotizing Enterocolitis	Porphyromonas gingivalis	2.10394
Necrotizing Enterocolitis	Treponema	2.10394
Necrotizing Enterocolitis	Selenomonas	2.10394
Periodontal	Prevotellaceae	2.09316
Atopy	Actinobacteria	2.09044
Atopy	Rikenellaceae	2.08928
Infectious colitis	Ruminococcaceae	2.08928
Infectious colitis	Rikenellaceae	2.08928
Atopy	Ruminococcaceae	2.08928
Atopic dermatitis	Fusobacterium nucleatum	2.06977
Liver cirrhosis	Alteromonadaceae	2.06419
Liver cirrhosis	Polyangiaceae	2.06419
Liver cirrhosis	Promicromonosporaceae	2.06419
Liver cirrhosis	Ruminococcus productus	2.06419
Liver cirrhosis	Clostridium cocleatum	2.06419
Liver cirrhosis	Aeromonadaceae	2.06419
Liver cirrhosis	Paenibacillaceae	2.06419
Liver cirrhosis	Peptostreptococcaceae	2.06419
Liver cirrhosis	Acidobacteriaceae	2.06419
Liver cirrhosis	Clostridiaceae	2.06419
Liver cirrhosis	Desulfovibrionaceae	2.06419
Liver cirrhosis	Cellulomonadaceae	2.06419
Liver cirrhosis	Anaerovorax	2.06419
Liver cirrhosis	Bifidobacterium catenulatum	2.06419
Liver cirrhosis	Syntrophobacteraceae	2.06419
Liver cirrhosis	Desulfobacteraceae	2.06419
Liver cirrhosis	Thiotrichaceae	2.06419
Liver cirrhosis	Bacillaceae	2.06419
Liver cirrhosis	Nitrospiraceae	2.06419
Atopic dermatitis	Megasphaera	2.06257
Atopy	Firmicutes	2.06235
Rheumatoid arthrits	Collinsella aerofaciens	2.05996
Necrotizing Enterocolitis	Tannerella	2.04684
Atopic sensitisation	Clostridia	2.03888
COPD	Propionibacterium	2.02378
COPD	Propionibacterium acnes	2.02378
Psoriasis	Oxalobacter formigenes	2.01934
Necrotizing Enterocolitis	Methanobrevibacter smithii	2.01823
Necrotizing Enterocolitis	Alcaligenaceae	2.01823
Necrotizing Enterocolitis	Coriobacteriaceae	2.01823
Necrotizing Enterocolitis	Erysipelotrichaceae	2.01823
Atopic dermatitis	Clostridium	2.01677
Necrotizing Enterocolitis	Acinetobacter	2.01602
Necrotizing Enterocolitis	Rickettsiales	2.01602
Necrotizing Enterocolitis	Oxalobacter formigenes	2.01602
Necrotizing Enterocolitis	Lysobacter	2.01602
Necrotizing Enterocolitis	Tropheryma whipplei	2.01602
Necrotizing Enterocolitis	Xanthomonas	2.01602
Necrotizing Enterocolitis	Corynebacterium	2.01602
Necrotizing Enterocolitis	Streptococcus mitis	2.01602
Rheumatoid arthrits	Klebsiella	2.01519
Necrotizing Enterocolitis	Prevotella copri	2.01383
Rheumatoid arthrits	Coxiellaceae	1.99985
Constipation Irritable bowel syndrome(IBS)	Klebsiella	1.99894
Atopy	Citrobacter	1.98798
Infectious colitis	Citrobacter	1.98798
Necrotizing Enterocolitis	Propionibacterium	1.97893
Necrotizing Enterocolitis	Propionibacterium acnes	1.97893
Inflammatory bowel disease(IBD)	Bacteroides	1.96998
Atopy	Bacteroides	1.96645
Constipation Irritable bowel syndrome(IBS)	Haemophilus	1.94285
Asthma	Erysipelotrichales	1.94183
Asthma	Enterococcus faecium	1.94183
Asthma	Bacteroidales	1.94183
Obesity	Fusobacteria	1.93159
Eczema	Enterobacteriaceae	1.9302
Necrotizing Enterocolitis	Bacteroides fragilis	1.92737
Colorectal carcinoma	Enterobacter hormaechei	1.92372
Colorectal carcinoma	Enterobacter aerogenes	1.92372
Asthma	Enterobacter aerogenes	1.92372
Asthma	Enterobacter hormaechei	1.92372
Asthma	Shigella dysenteriae	1.92372
Asthma	Klebsiella pneumoniae	1.92372
Colorectal carcinoma	Shigella dysenteriae	1.92372
Colorectal carcinoma	Klebsiella pneumoniae	1.92372
Gastro-oesophageal reflux	Prevotellaceae	1.91512
[truncated: 8,939 more rows]
